# Supplementary material for: H2O2-promoted C–C bond oxidative cleavage of β-O-4 lignin models to benzanilides using water as a solvent under metal-free conditions
Source: Royal Society of Chemistry journal article supplement (doi:10.1039/d2gc00878e), 2022-01-01
Supplement: d2gc00878e1.pdf [file d2gc00878e1.pdf]

# H<sub>2</sub>O<sub>2</sub> promoted C-C bond oxidative cleavage of β-O-4 lignin models to benzanilides using water as solvent under metal-free conditions

*Xinwei Liu\**, *Liguo Wang*, *Lianjing Zhai*, *Cailing Wu\** and *Huanjun Xu\**

## Contents

|                                                                               |    |
|-------------------------------------------------------------------------------|----|
| <b>1. General Experimental Methods</b> .....                                  | 2  |
| <b>2. Synthesis of lignin models</b> .....                                    | 3  |
| <b>3. Additional Screening of Reaction Conditions</b> .....                   | 4  |
| <b>4. Control experiments</b> .....                                           | 6  |
| <b>5. Detection by GC</b> .....                                               | 7  |
| <b>6. <sup>1</sup>H NMR and <sup>13</sup>C NMR spectra of compounds</b> ..... | 8  |
| <b>7. References</b> .....                                                    | 25 |

## **1. General Experimental Methods**

### **1.1 Materials**

All reagents and solvents were purchased from Accela, Adamas, Innochem, Psaitong and Aladdin. Unless otherwise noted, materials obtained from commercial suppliers were used without further purification. All the reactions were carried out under an air atmosphere.

### **1.2 Instrumentation**

Products were purified by flashchromatography on silica gel. Analysis of crude reaction mixture was performed on an Agilent 7820A GC System with a HP-INNOWAX capillary column (30 m×0.25 mm×0.32 μm) and an FID detector. The following GC temperature program was used: 40°C is maintained for 0 minutes, then rises to 150 °C at 30 °C/min, and finally rises to 300 °C at a rate of 20 °C/min, and hold for 4 minutes.

Nitrogen was used as a carrier gas. The injector temperature was held at 250 °C. GC-MS analysis was carried out on a SHIMADZU GCMS-QP2010 with a DB-5 capillary column (30 m×0.25 mm×0.32 μm). <sup>1</sup>H NMR spectra were recorded in CDCl<sub>3</sub> or DMSO using internal reference (the residue proton peaks of CDCl<sub>3</sub> at 7.26 ppm and DMSO at 2.5 ppm) on Bruker 400 spectrometer. Liquid <sup>13</sup>C NMR was recorded at 100.6 MHz in CDCl<sub>3</sub> using residual CDCl<sub>3</sub> as internal reference (the residue proton peaks of CDCl<sub>3</sub> at 77.02 ppm and DMSO at 40.03 ppm).

## 2.Synthesis of lignin models

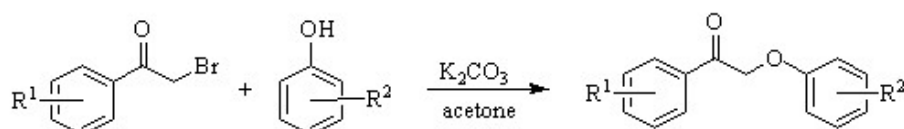

**Scheme S1** synthetic ketone lignin model

The synthesis reaction was carried out in a 150 mL round glass flask containing a condenser. 2-phenoxyacetophenone were synthesized by the reaction of the corresponding phenol with 2-bromoacetophenone according to the reported procedure.<sup>1</sup> Typically, 2-bromoacetophenone (5 mmol) is dissolved in a solution of K<sub>2</sub>CO<sub>3</sub> (7.5 mmol, 1.036 g) and phenol (5 mmol) in acetone (50 mL) and loaded in a reactor. The reaction mixture is then stirred at reflux temperature for 5 hours, filtered and vacuumized. The residue was purified by column chromatography with hexane:ethyl acetate a stirring. For the other methoxy substituted 2-phenoxy-1-phenylethanone, the preparation procedure is the same as described above, except of using different starting materials.

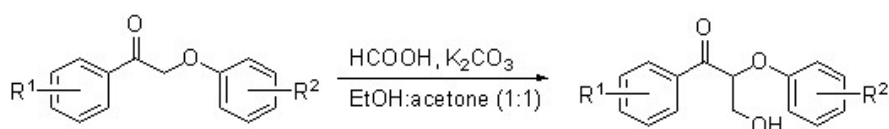

**Scheme S2** synthetic 3-hydroxy-2-phenoxy-1-phenylpropan-1-one

To a stirring suspension of K<sub>2</sub>CO<sub>3</sub> (0.6 g, 4.3 mmol) in ethanol/acetone (v/v = 1/1, 20 mL) and 2-phenoxyacetophenones (0.78 g, 4 mmol) at rt., a water solution of formaldehyde (36.5~38 wt %, 0.6 mL, 7.3 mmol) was added. After 4 h, the reaction mixture was filtered to remove K<sub>2</sub>CO<sub>3</sub> and concentrated in vacuo to get a solid product. The crude product was purified with petroleum ether: ethyl acetate (3:1) to obtain the required 2-phenoxyacetophenone, on silica gel to obtain 3-hydroxy-1,2-diphenylpropan-1-one in 90% yield.

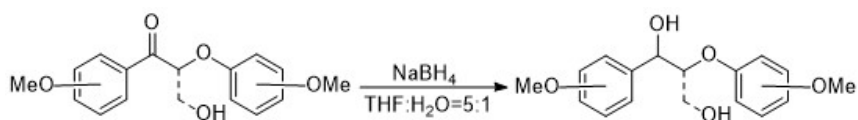

**Scheme S3** synthetic alcohol lignin model compound

The resulting compound (3.5 mmol, 0.847 g) was dissolved in the mixture of THF:H<sub>2</sub>O (5:1) (25 mL), and sodium borohydride (7 mmol, 0.26 g) was added portion wise to maintain a gentle evolution of gas. Then, the mixture was stirred for 6 h at room temperature. The reaction mixture was quenched with saturated aqueous NH<sub>4</sub>Cl (50 mL) and diluted with 30 mL water. The aqueous portion was extracted with ethyl acetate (3×30 mL). The organic parts were combined, dried over MgSO<sub>4</sub>, filtered and concentrated under vacuum. The residue was purified by column chromatography with hexane:ethyl acetate (2:1).

### 3. Additional Screening of Reaction Conditions

#### 3.1 Synthesis of aromatic amides

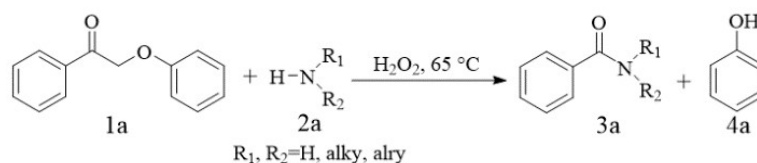

**Scheme S4** Synthesis of aromatic amides

The synthesis was carried out in a 5 mL reaction tube. Taking the synthesis of benzanilide as an example, the reaction steps are as follows. 2-phenoxyacetophenone (0.5 mmol), aniline (1.5 mmol), H<sub>2</sub>O (1.5 mL), and H<sub>2</sub>O<sub>2</sub> (0.5 mL) were loaded into the reaction. Transfer the tube to an oil bath at a specified temperature (e.g., 65 °C) and maintain the required reaction time at that temperature. The reaction solution is then treated to separate the unreacted reactants and products. First, an aqueous solution of hydrochloric acid (10 mL) was added to the reaction mixture, followed by 10 mL dichloromethane to extract the organic compounds. The composition of the reaction solution was determined by gas chromatography using n-dodecane as the internal standard. The organic phase was further purified by silica gel column chromatography to obtain the desired product (eluent: petroleum ether/ethyl acetate=50/1), thus obtaining the isolated yield of the product.

#### 3.2 Optimization of reaction conditions

**Table S1** Optimization of reaction conditions

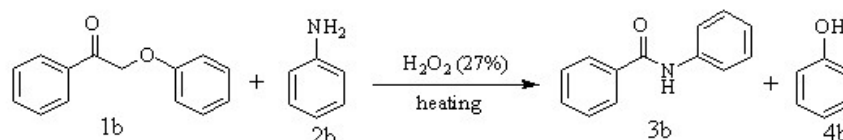

A

| Entry | amounts of aniline<br>(x eq) | Yield(%) |    | Conversion<br>(%) |
|-------|------------------------------|----------|----|-------------------|
|       |                              | 3b       | 4b |                   |
| 1     | 1                            | 30       | 33 | 42                |
| 2     | 2                            | 58       | 64 | 76                |
| 3     | 3                            | 82       | 86 | 94                |
| 4     | 4                            | 83       | 87 | 93                |
| 5     | 5                            | 82       | 87 | 95                |

**B**

| Entry | temperatures<br>(°C) | Yield(%) |    | Conversion<br>(%) |
|-------|----------------------|----------|----|-------------------|
|       |                      | 3b       | 4b |                   |
| 1     | 35                   | 27       | 29 | 33                |
| 2     | 45                   | 39       | 47 | 56                |
| 3     | 55                   | 58       | 62 | 74                |
| 4     | 65                   | 82       | 86 | 90                |
| 5     | 75                   | 78       | 84 | 94                |
| 6     | 85                   | 78       | 80 | 95                |

**C**

| Entry | times (h) | Yield(%) |    | Conversion<br>(%) |
|-------|-----------|----------|----|-------------------|
|       |           | 3b       | 4b |                   |
| 1     | 5         | 42       | 47 | 52                |
| 2     | 6         | 54       | 56 | 60                |
| 3     | 7         | 66       | 68 | 79                |
| 4     | 8         | 82       | 86 | 89                |
| 5     | 9         | 81       | 88 | 96                |
| 6     | 10        | 83       | 87 | 97                |

**D**

| Entry | amounts of<br>H <sub>2</sub> O <sub>2</sub> (mL) | Yield(%) |    | Conversion<br>(%) |
|-------|--------------------------------------------------|----------|----|-------------------|
|       |                                                  | 3b       | 4b |                   |
| 1     | 0.1                                              | 42       | 45 | 60                |
| 2     | 0.25                                             | 60       | 68 | 79                |
| 3     | 0.5                                              | 82       | 86 | 90                |
| 4     | 0.75                                             | 81       | 86 | 92                |
| 5     | 1                                                | 82       | 85 | 93                |

Oxidative amidation of lignin model compound. General reaction conditions: 1b (0.5 mmol), H<sub>2</sub>O<sub>2</sub> (27 wt.% 0.5 mL), H<sub>2</sub>O (1.5 mL) and aniline (1.5 mmol) at 65 °C for 8 h. A) Different amounts of aniline. B) Different reaction temperatures. C.) Different reaction times. D) Different amounts of H<sub>2</sub>O<sub>2</sub>.

#### 4. Control experiments

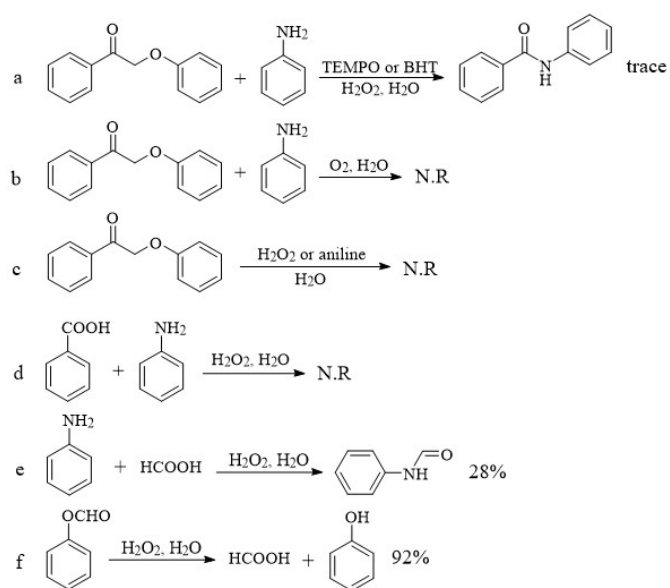

**Scheme S5.** Reaction conditions: substrate (0.5 mmol), H<sub>2</sub>O<sub>2</sub> (27 wt.% 0.5 mL), H<sub>2</sub>O (1.5 mL), aniline (1.5 mmol) and formic acid (1 mmol) at 65 °C for 8 h.

## 5. Detection by GC

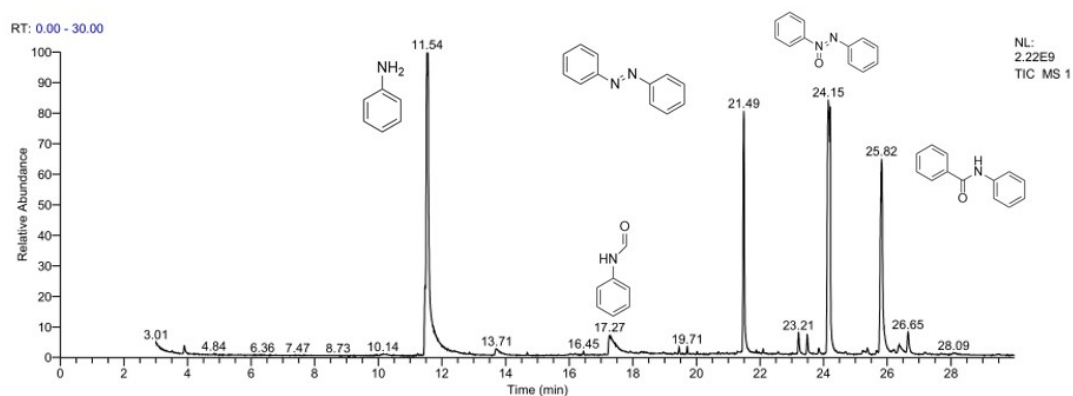

**Figure S1** GC-MS of the reaction solution. Conditions: 1 (0.5 mmol), H<sub>2</sub>O<sub>2</sub> (27 wt.% 0.5 mL), H<sub>2</sub>O (1.5 mL) and aniline(3 mmol) at 65 °C for 8 h.

Some by-products are affected by the reaction system. When we add aniline in batches, it can effectively reduce the reaction of aniline itself. In addition, we also found the final product formanilide by GC-MS, which further proved the reaction mechanism.

## 6.<sup>1</sup>H NMR and <sup>13</sup>C NMR spectra of compounds

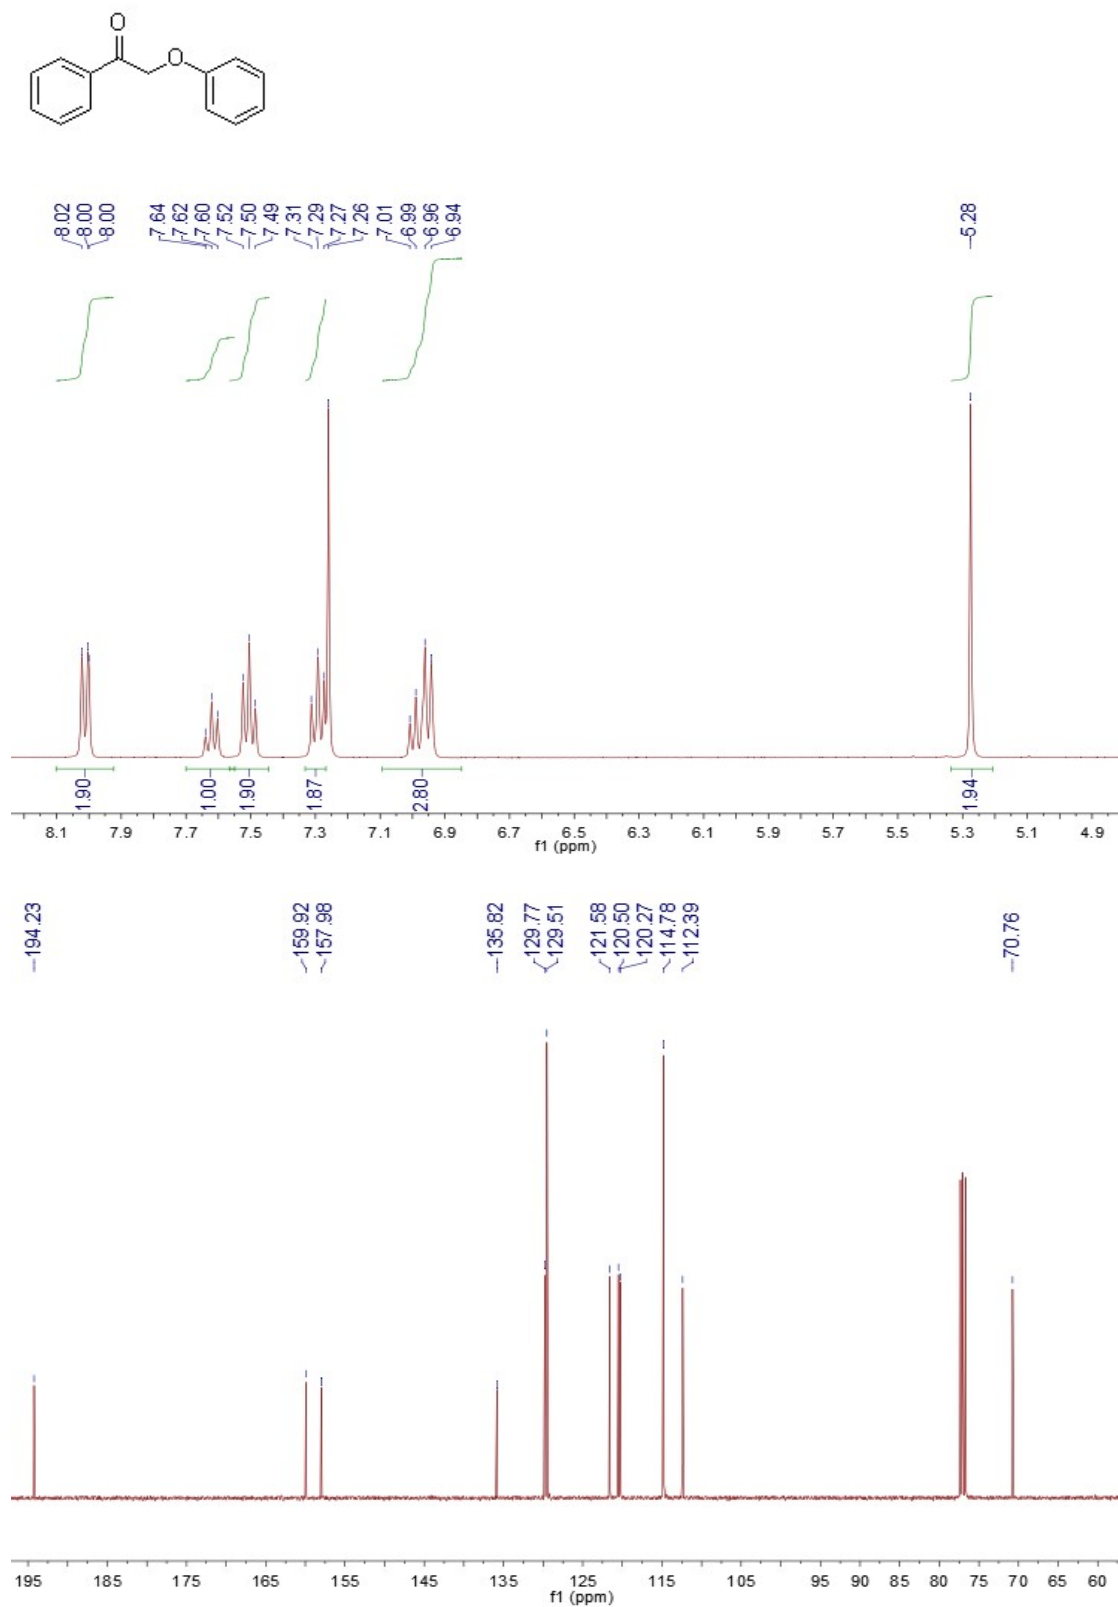

**Figure S2** <sup>1</sup>H (top) and <sup>13</sup>C (bottom) NMR spectra of 2-phenyloxy-acetophenone



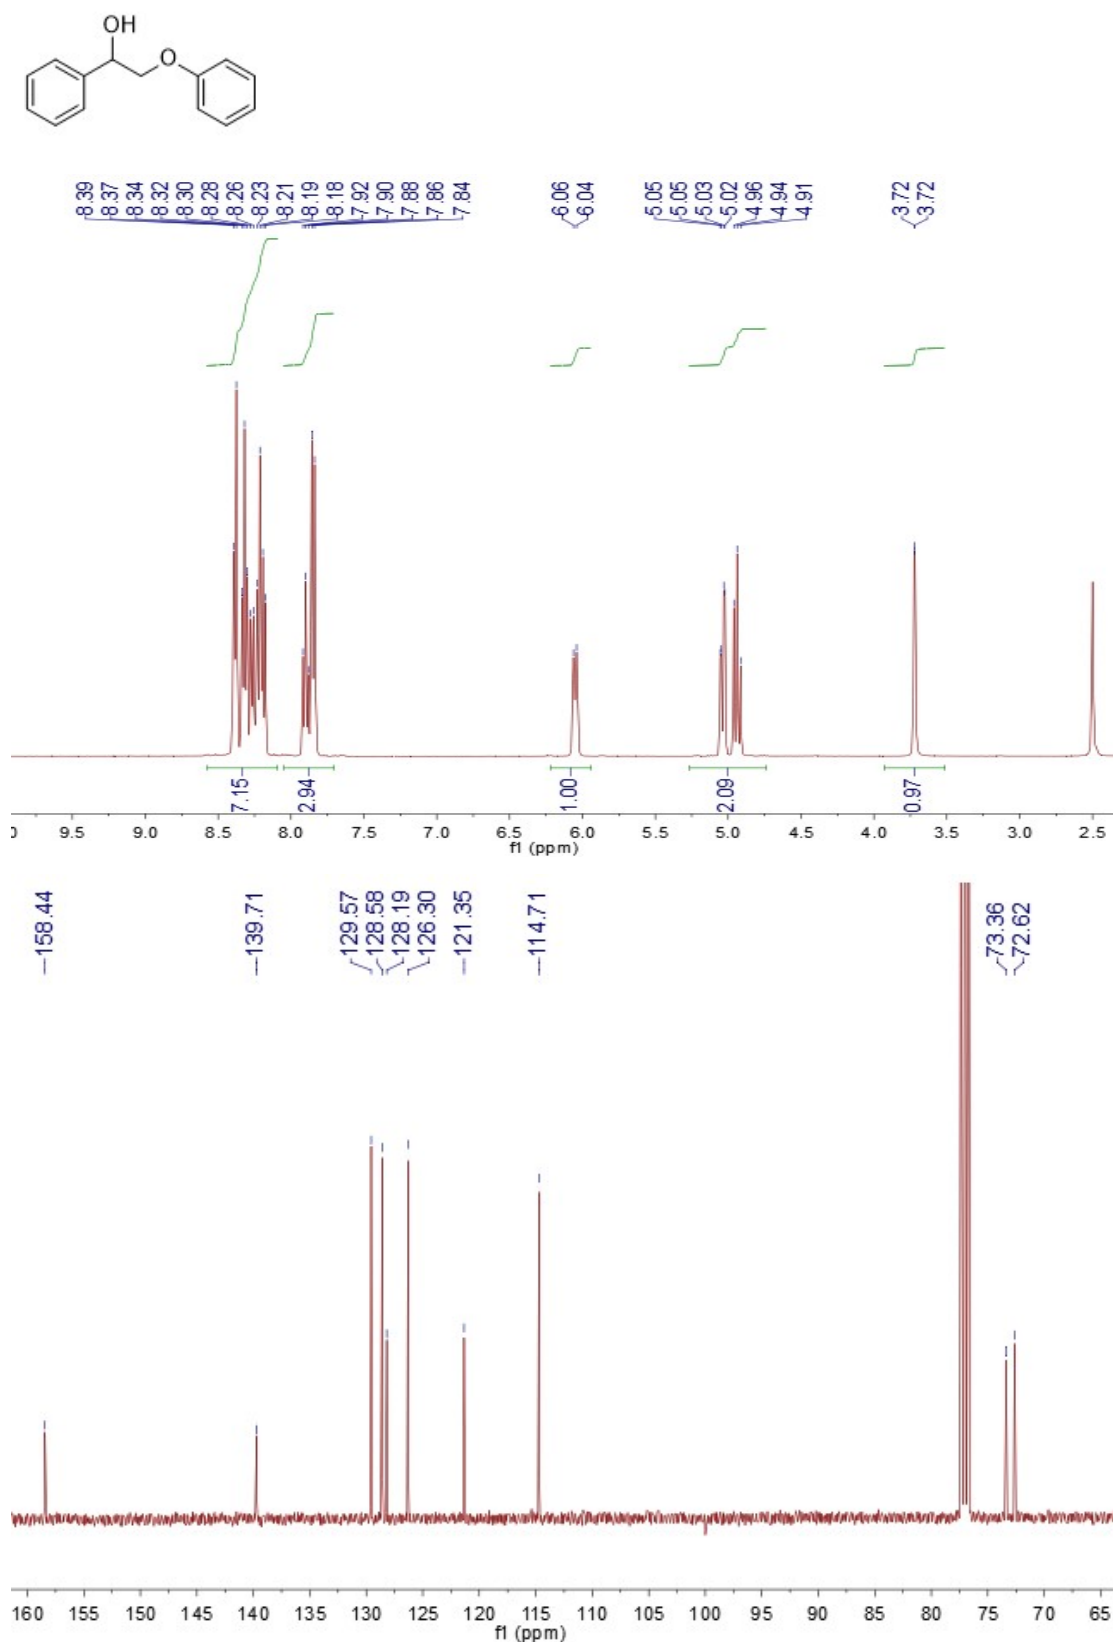

**Figure S3** <sup>1</sup>H (top) and <sup>13</sup>C (bottom) NMR spectra of 2-Phenoxy-1-phenyl-ethanol

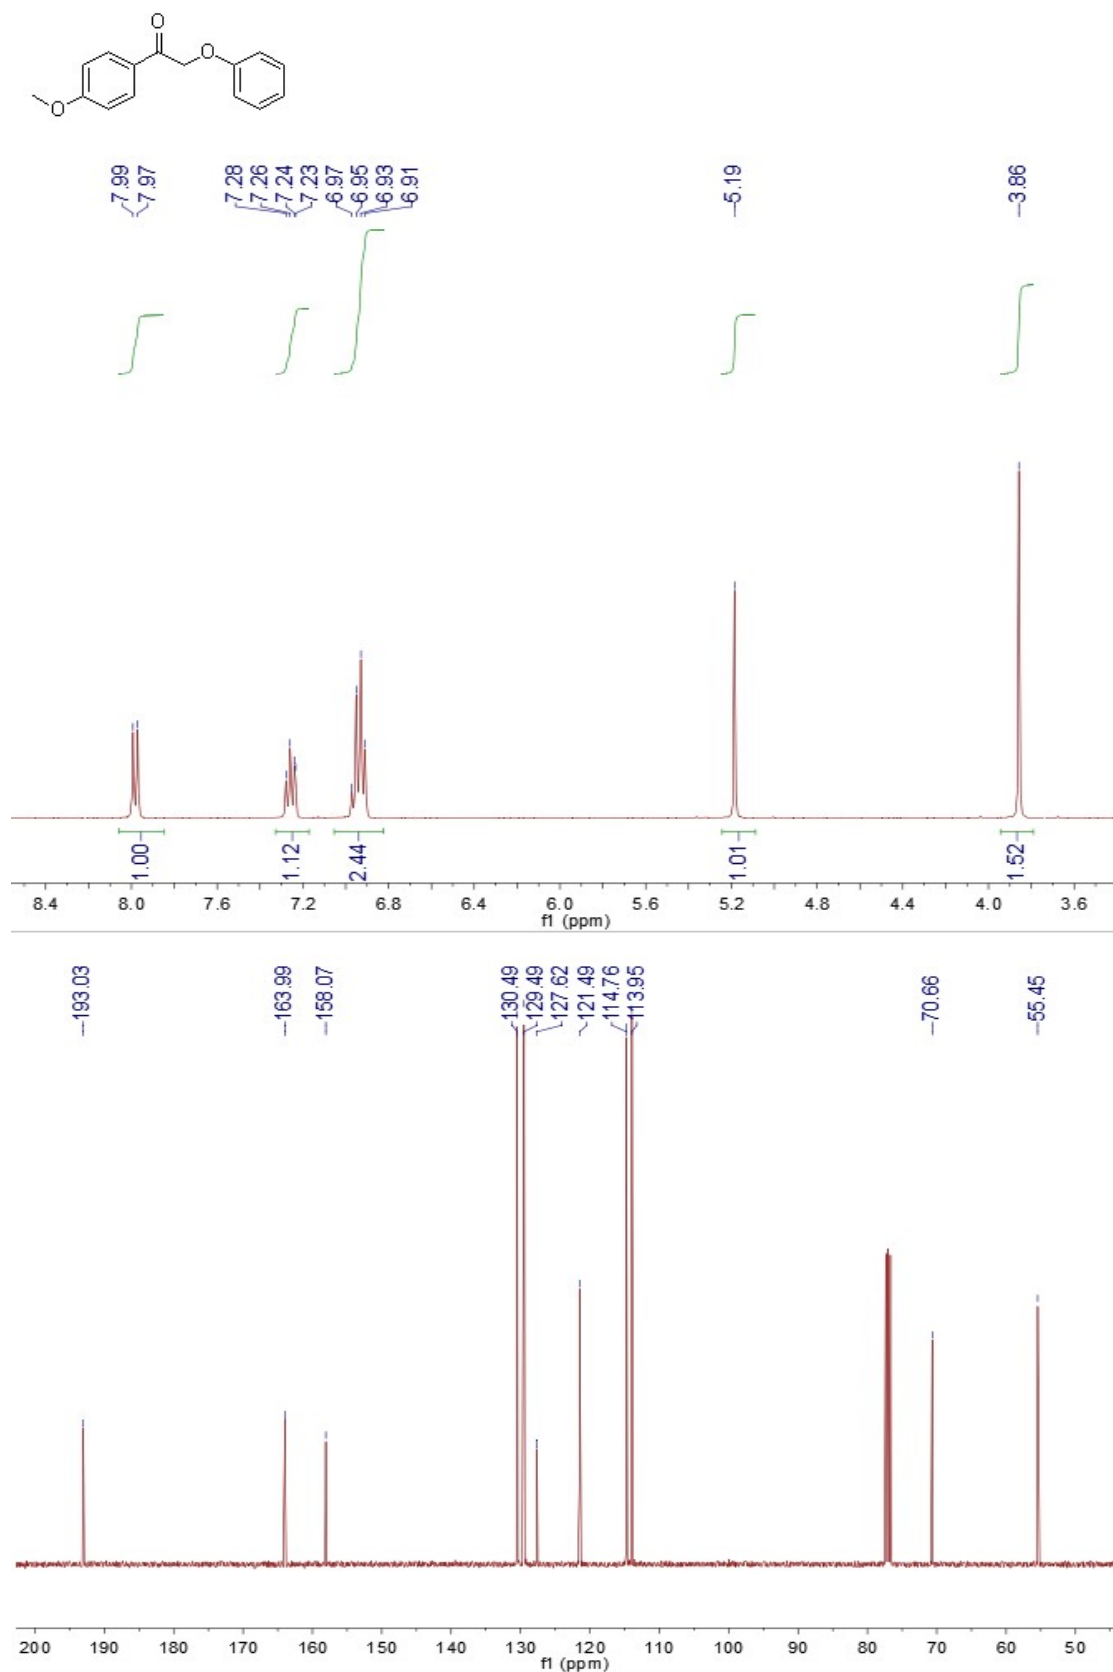

Figure S4 <sup>1</sup>H (top) and <sup>13</sup>C (bottom) NMR spectra of 1-(4-methoxyphenyl)-2-phenoxyethan-1-one

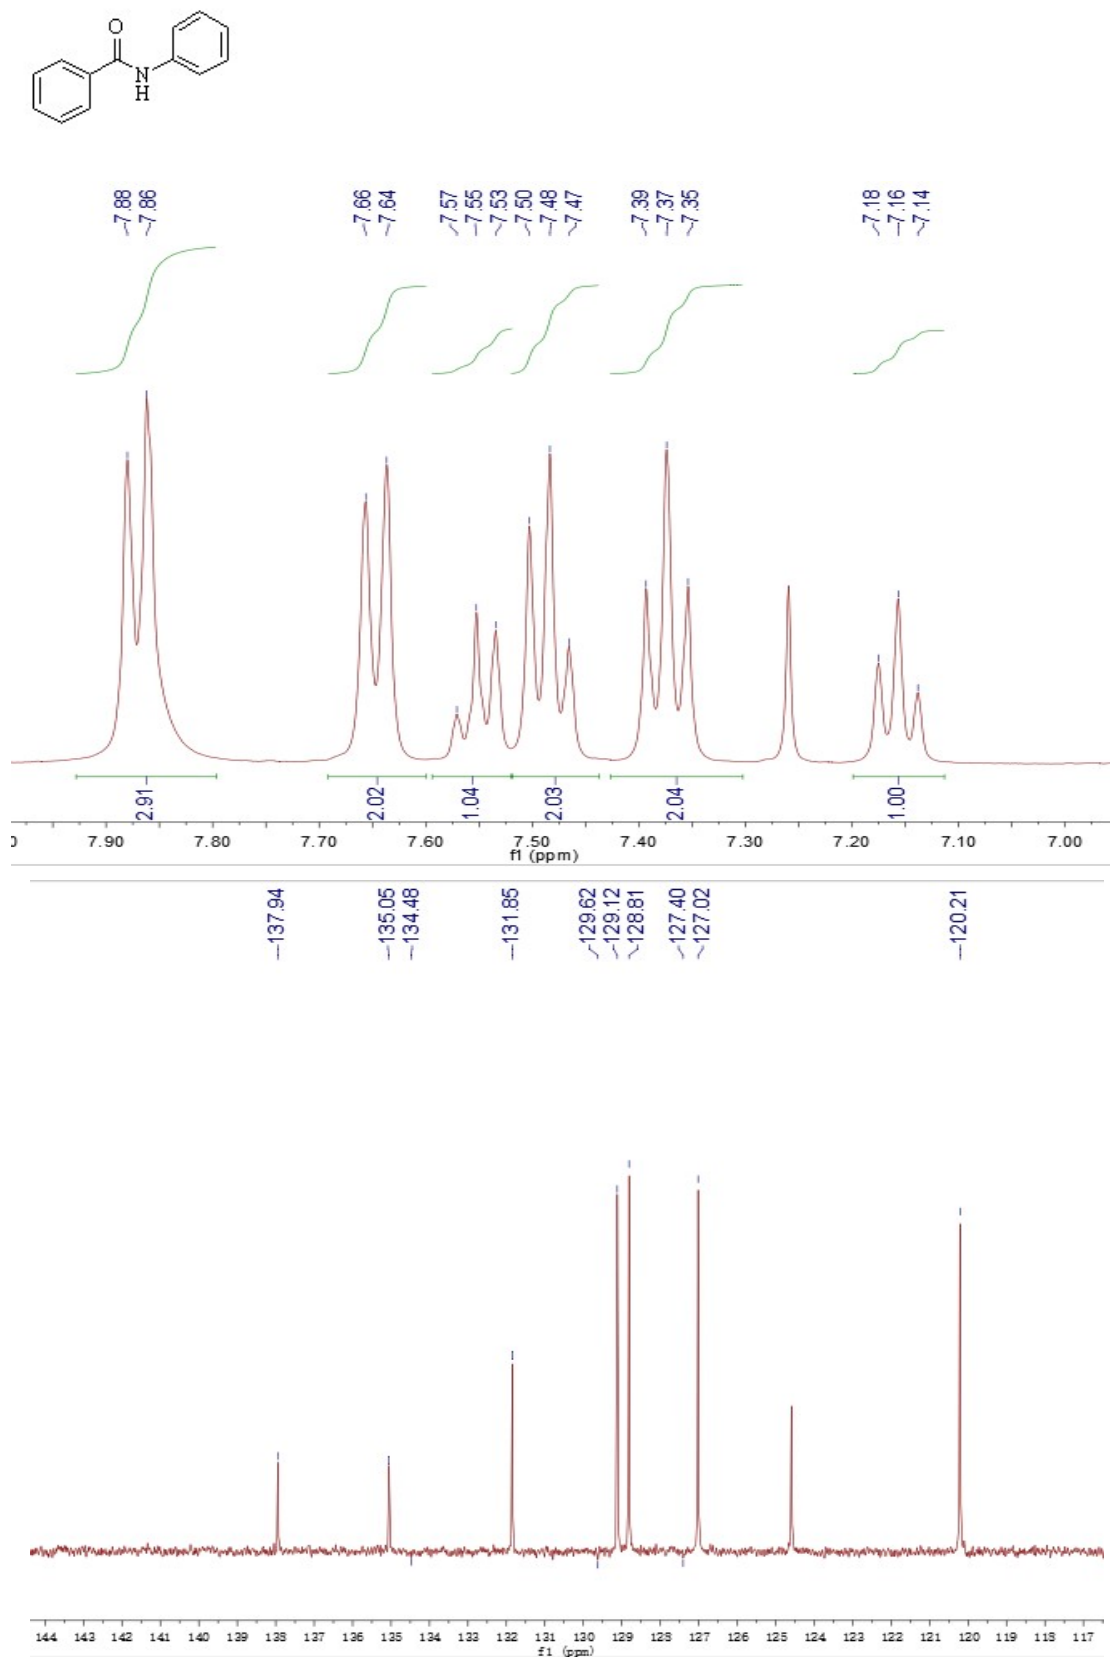

Figure S5 <sup>1</sup>H (top) and <sup>13</sup>C (bottom) NMR spectra of N-phenylbenzamide

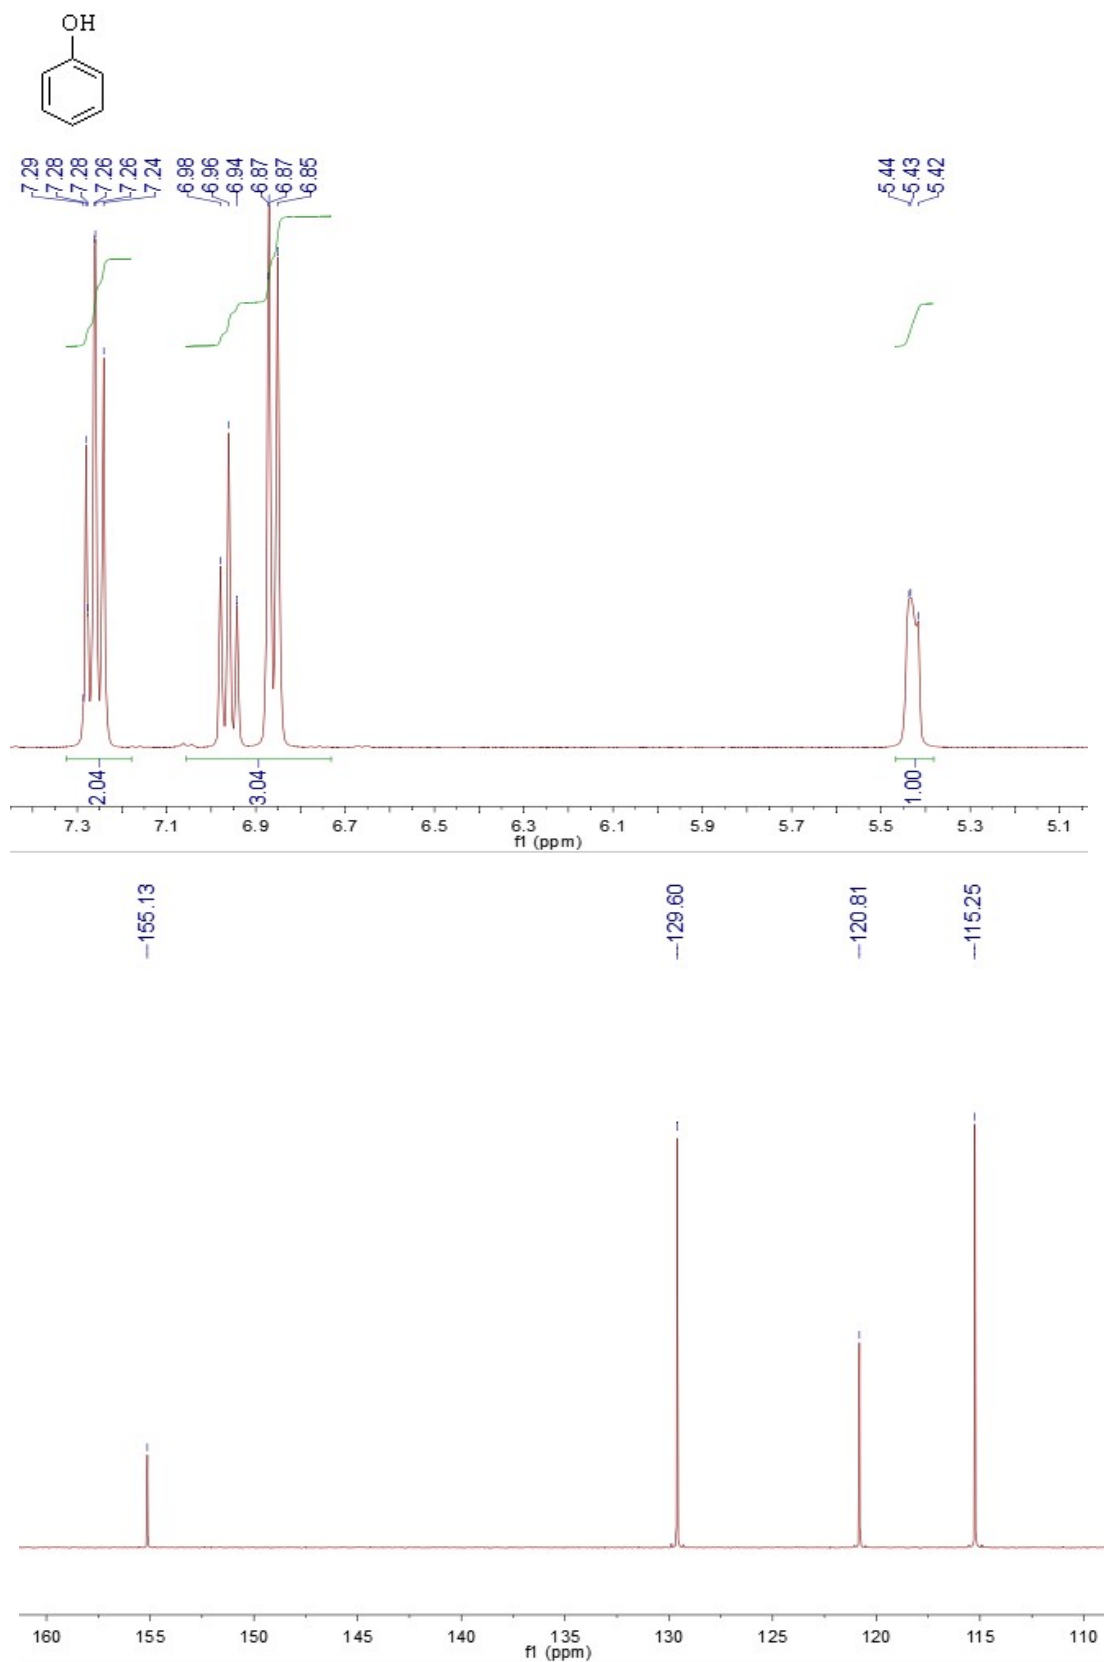

**Figure S6**  $^1\text{H}$  (top) and  $^{13}\text{C}$  (bottom) NMR spectra of phenol

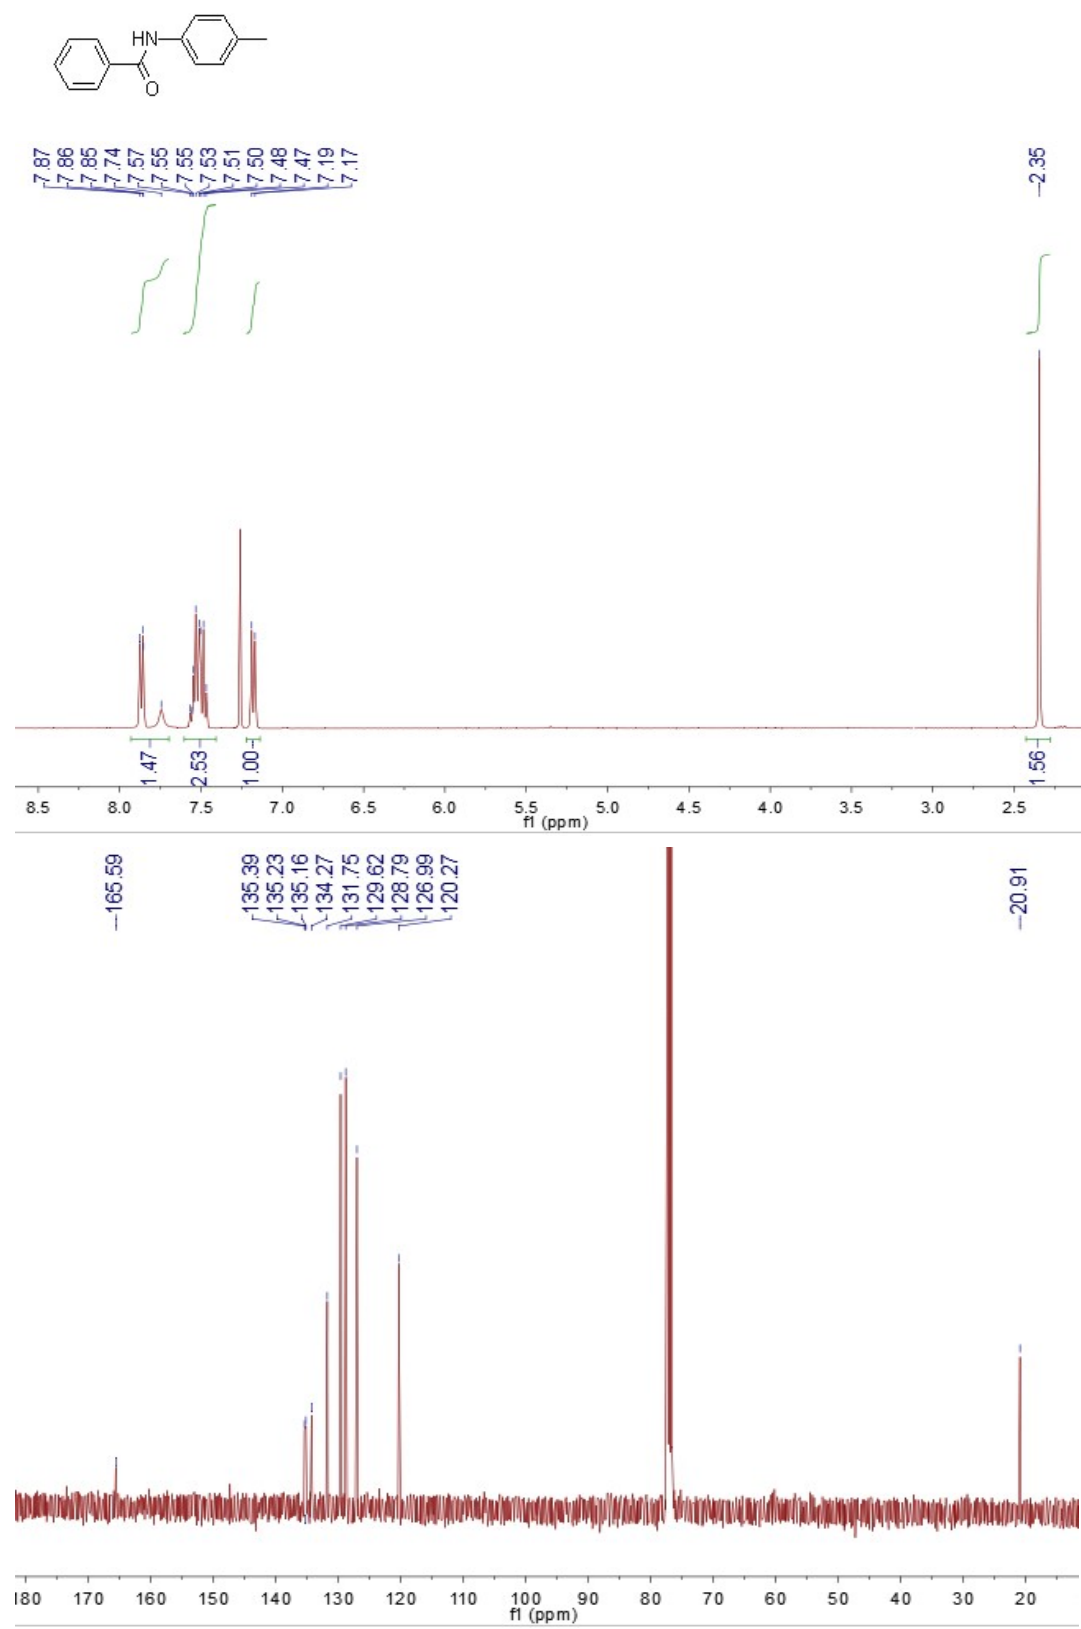

**Figure S7** <sup>1</sup>H (top) and <sup>13</sup>C (bottom) NMR spectra of N-(p-tolyl)benzamide

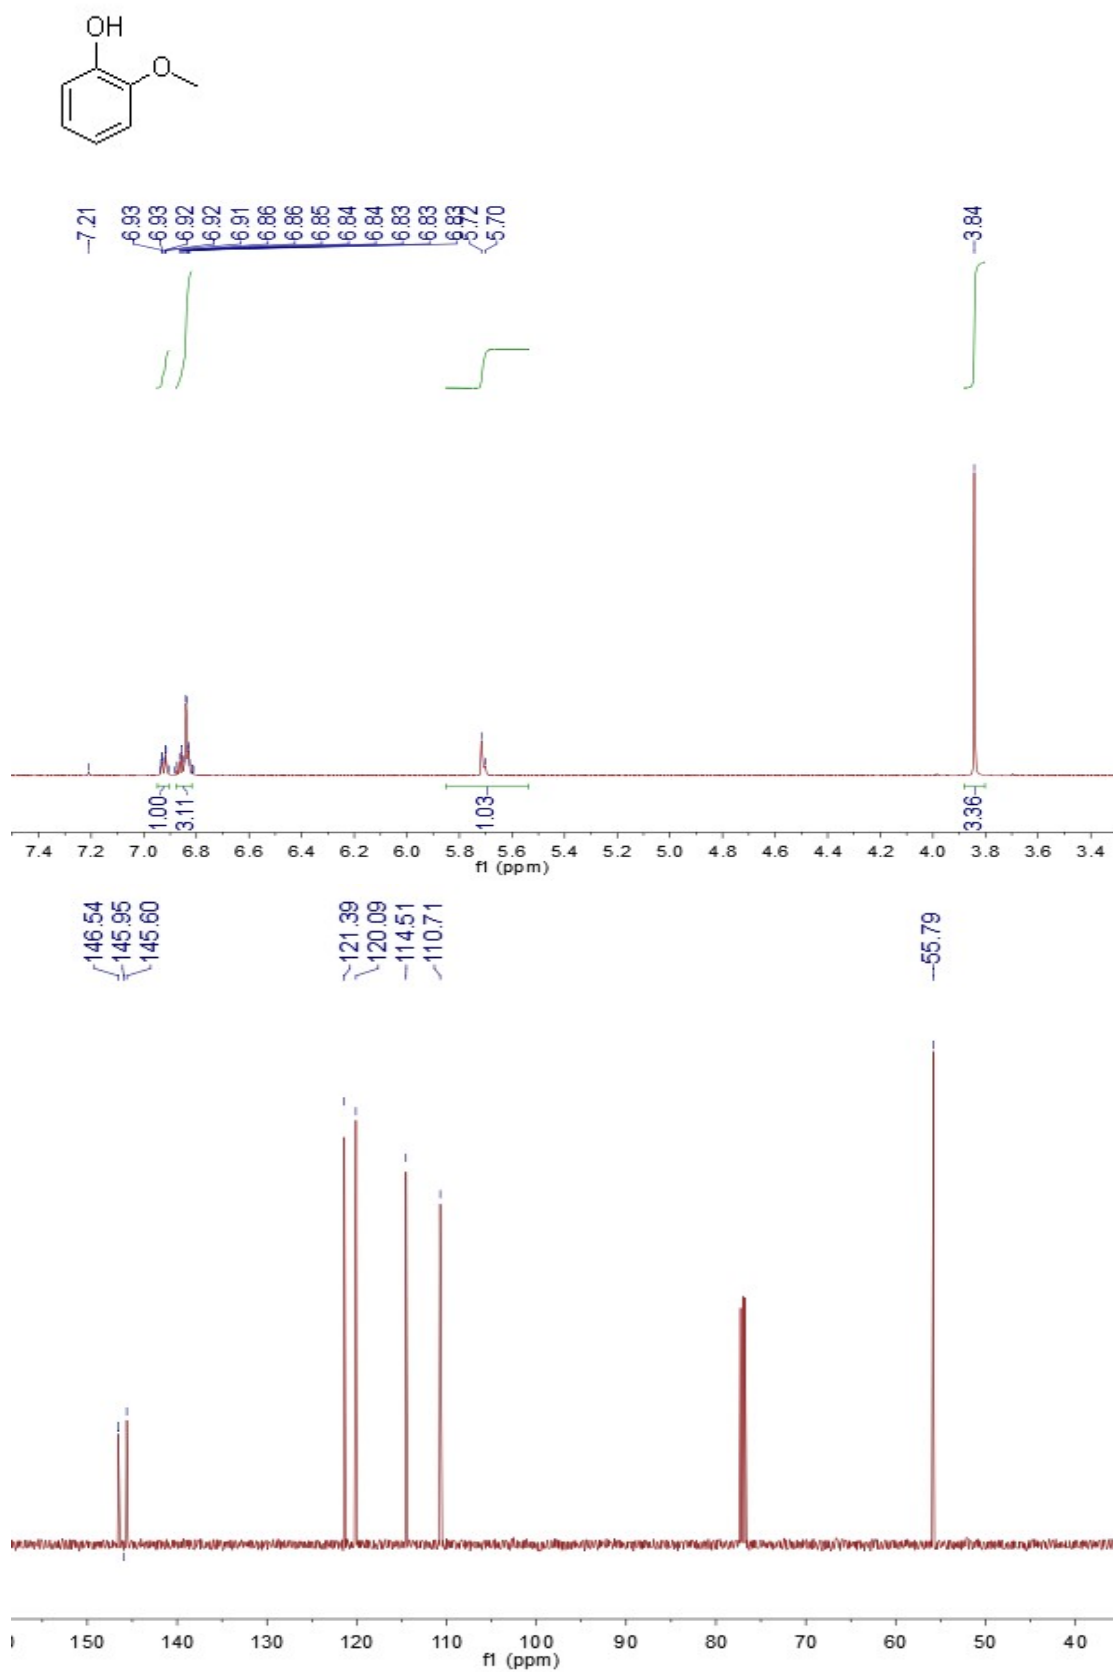

**Figure S8** <sup>1</sup>H (top) and <sup>13</sup>C (bottom) NMR spectra of 2-methoxyphenol

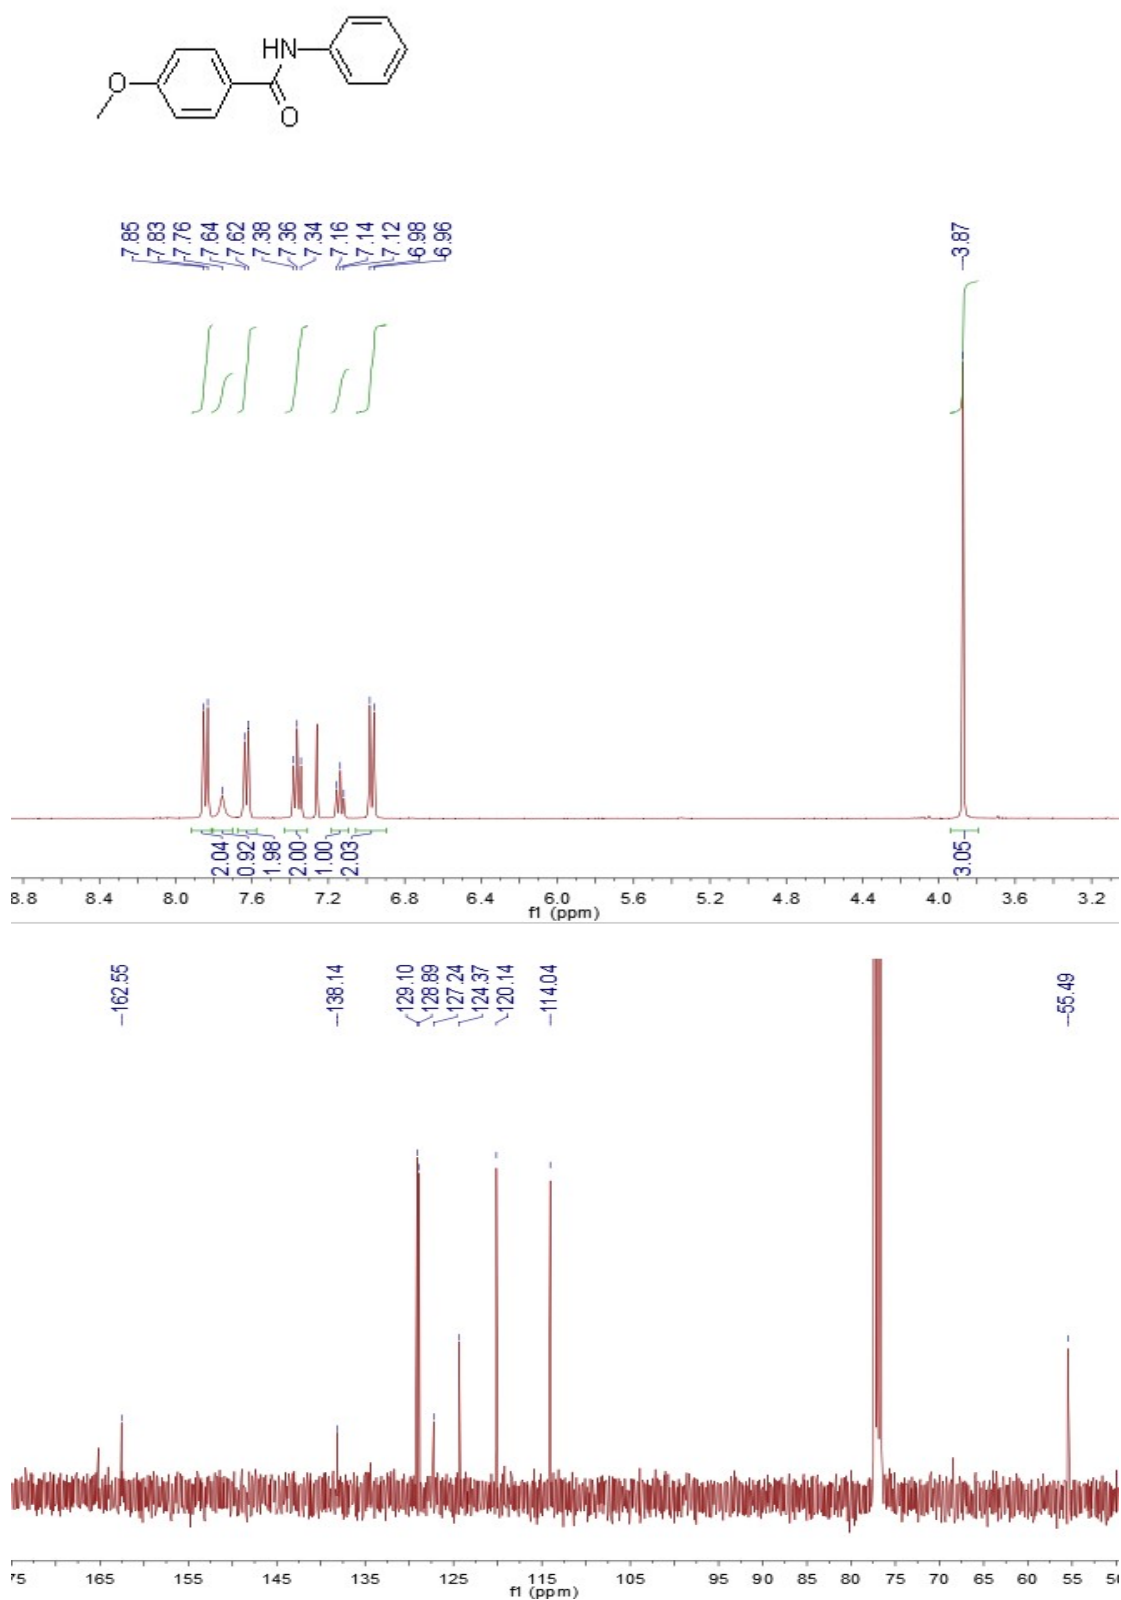

**Figure S9** <sup>1</sup>H (top) and <sup>13</sup>C (bottom) NMR spectra of 4-methoxy-N-phenylbenzamide

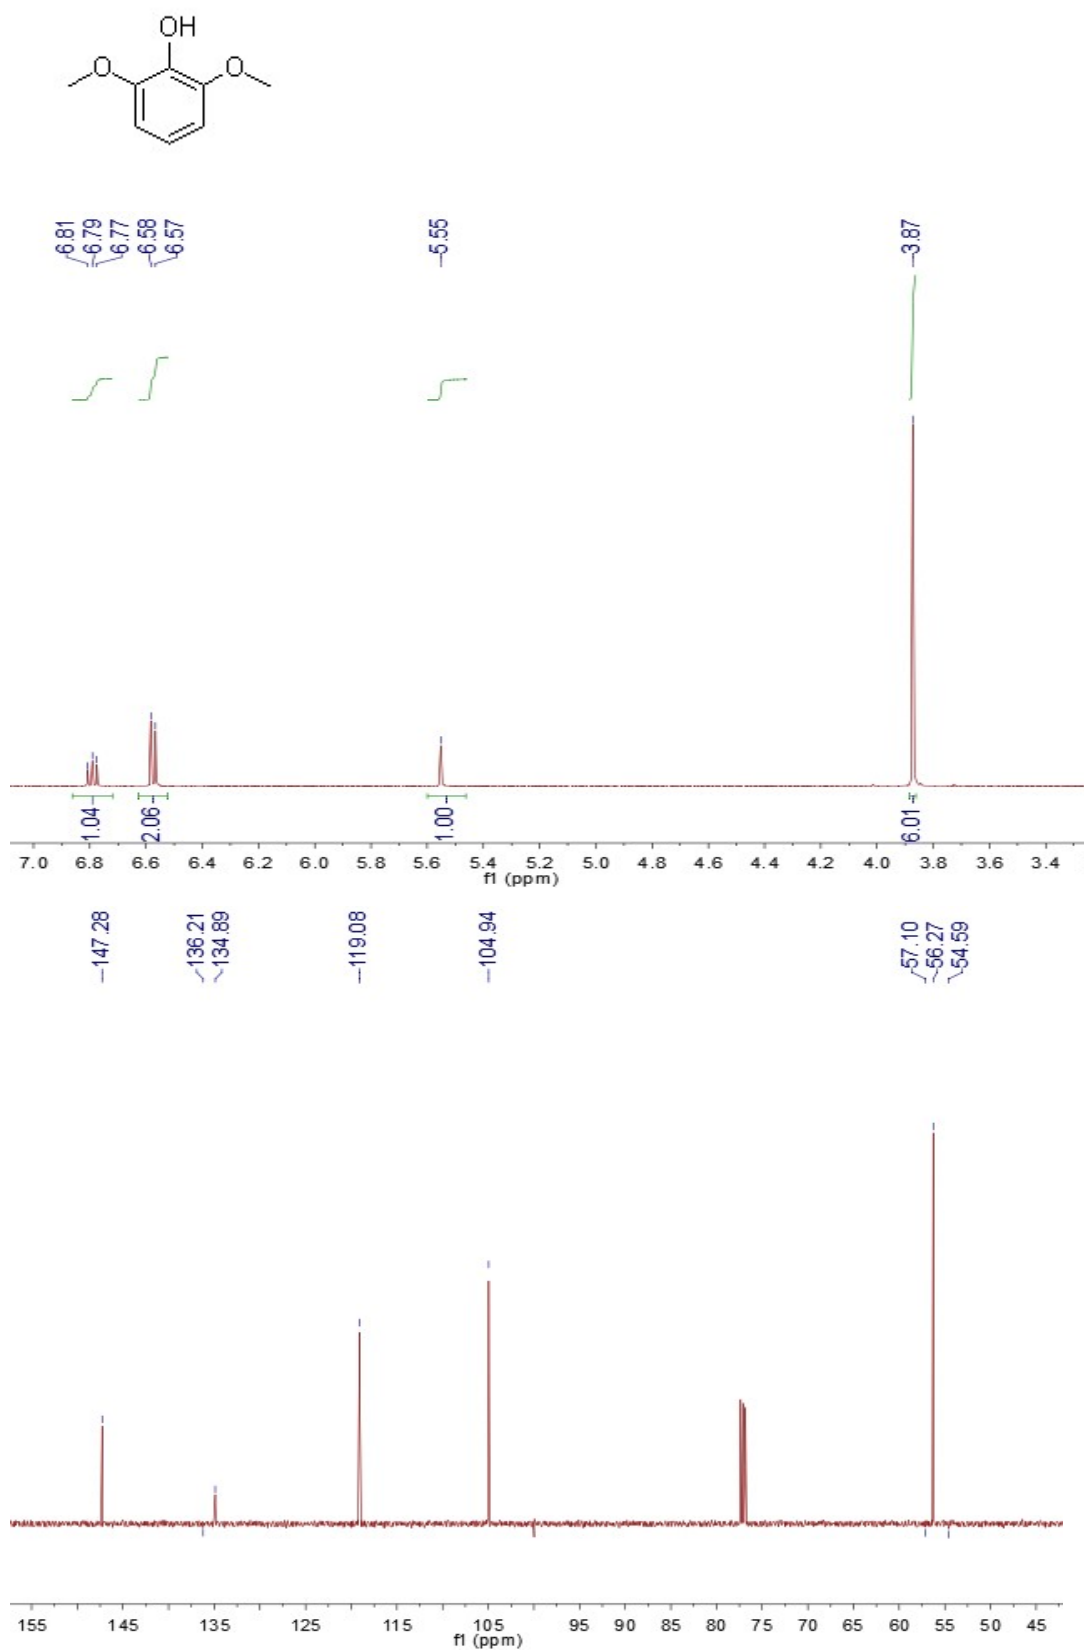

**Figure S10** <sup>1</sup>H (top) and <sup>13</sup>C (bottom) NMR spectra of 2,6-dimethoxyphenol



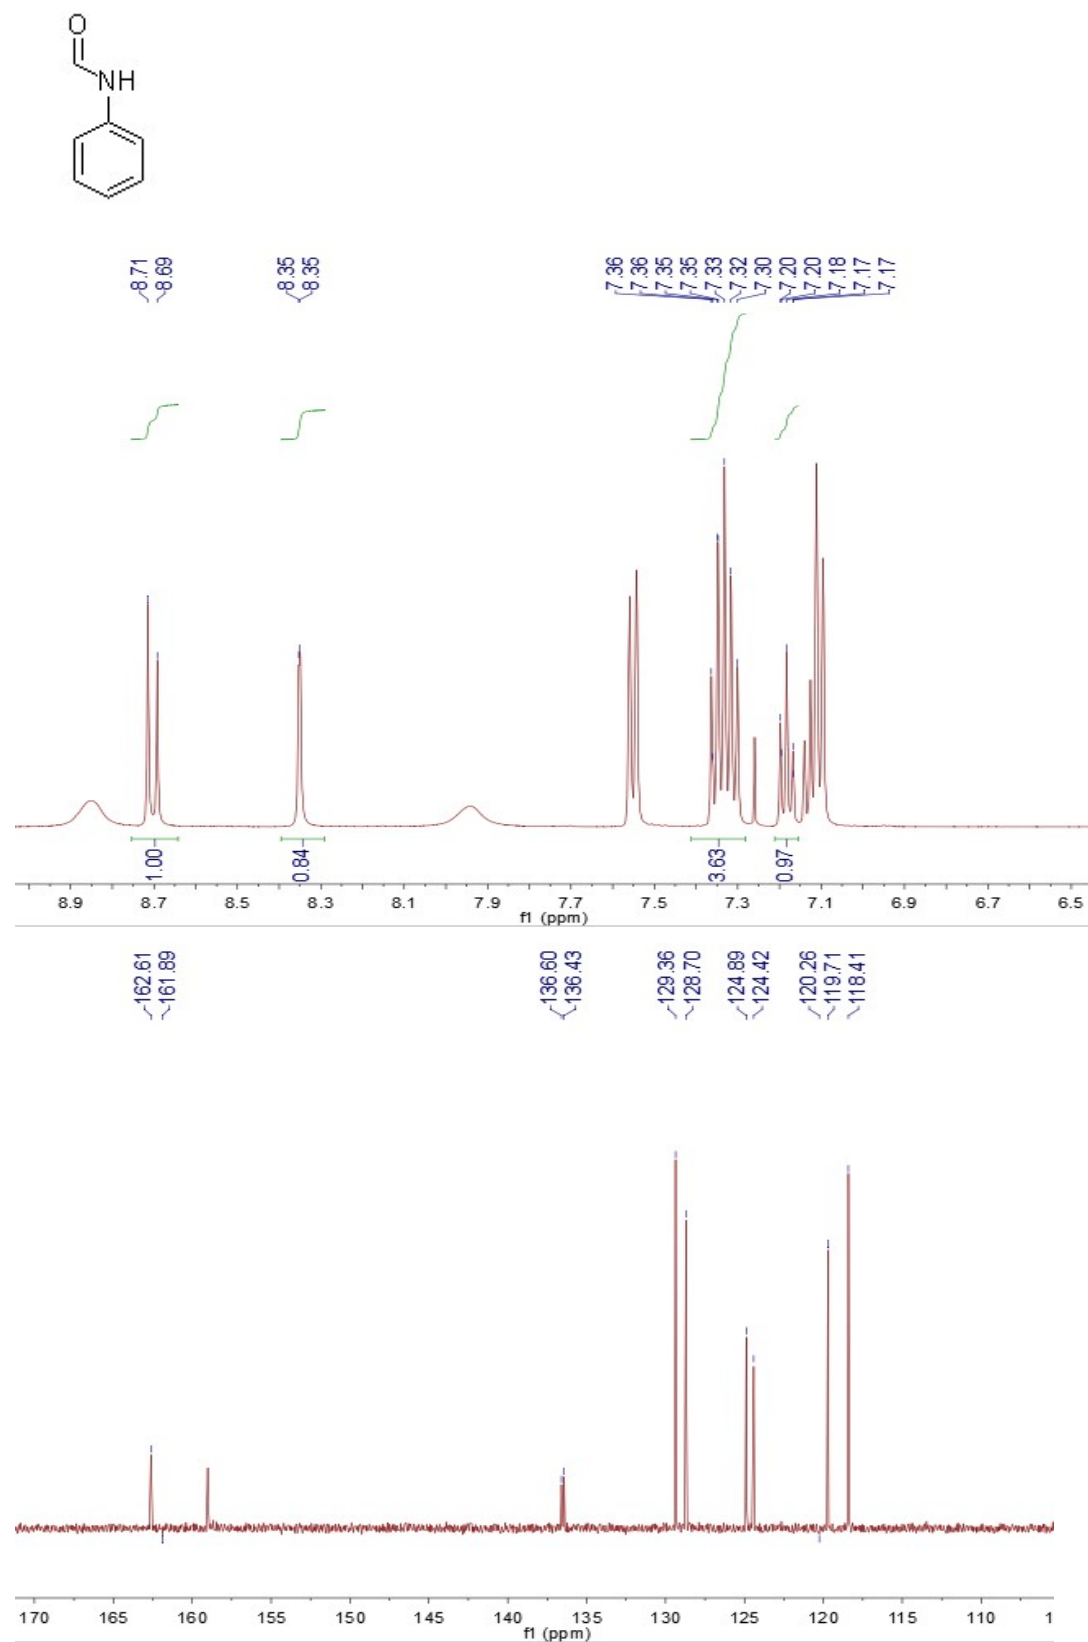

**Figure S11** <sup>1</sup>H (top) and <sup>13</sup>C (bottom) NMR spectra of N-phenylformamide

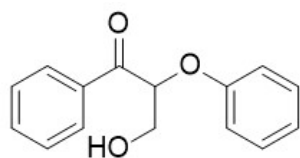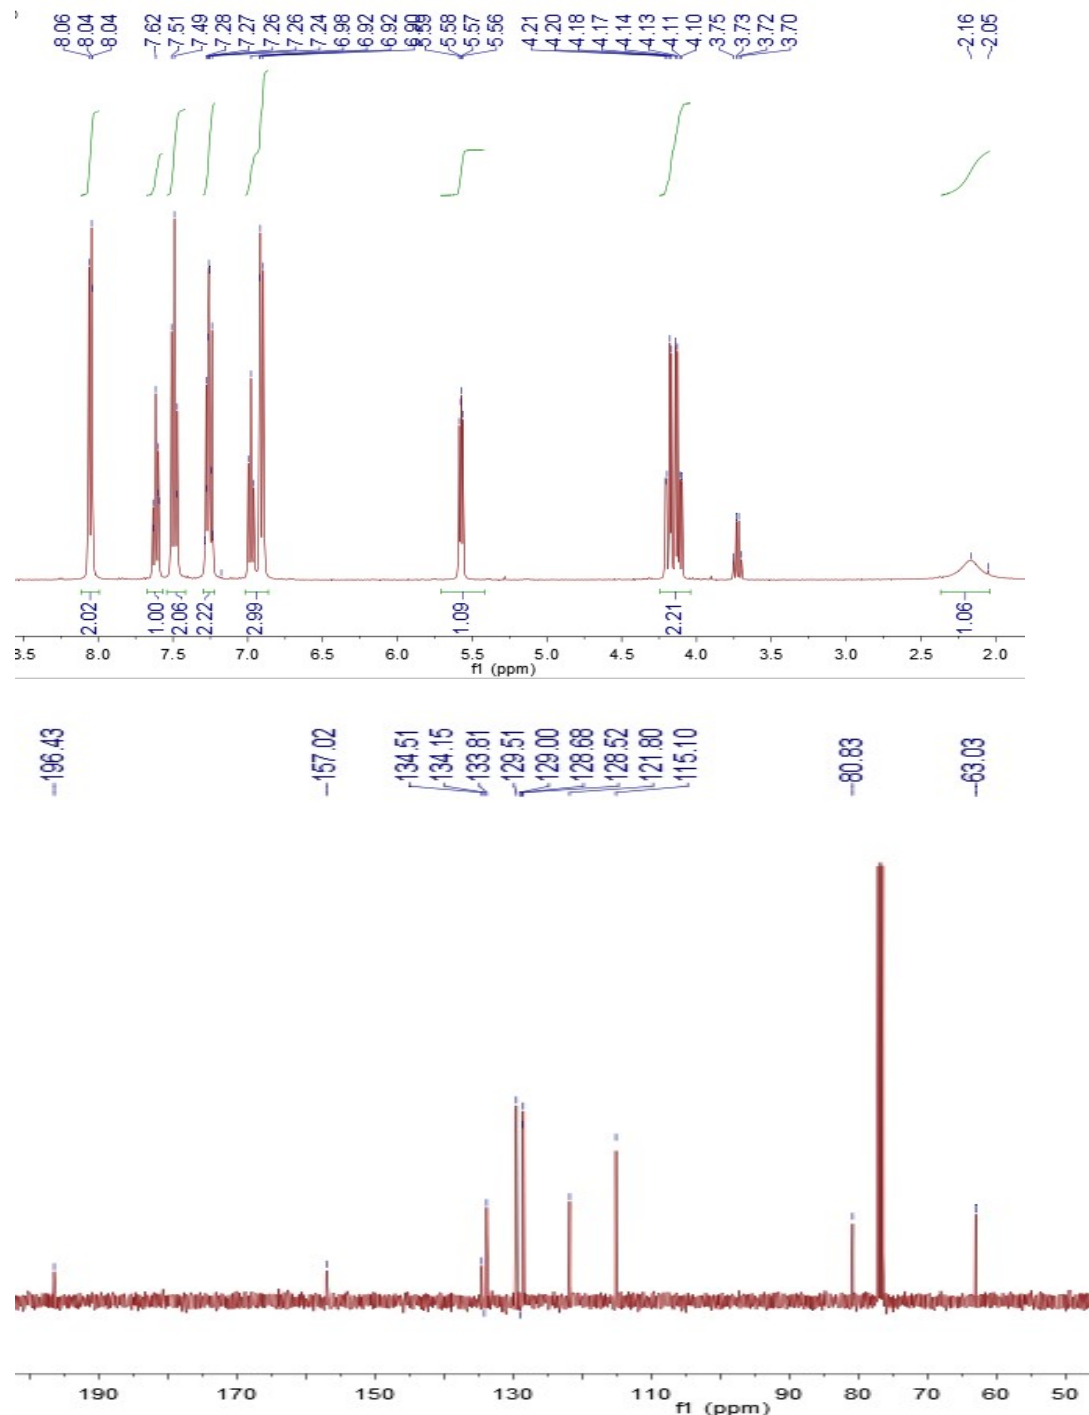

**Figure S12** <sup>1</sup>H (top) and <sup>13</sup>C (bottom) NMR spectra of 2-(cyclohexa-1,5-dien-1-yloxy)-3-hydroxy-1-phenylpropan-1-one

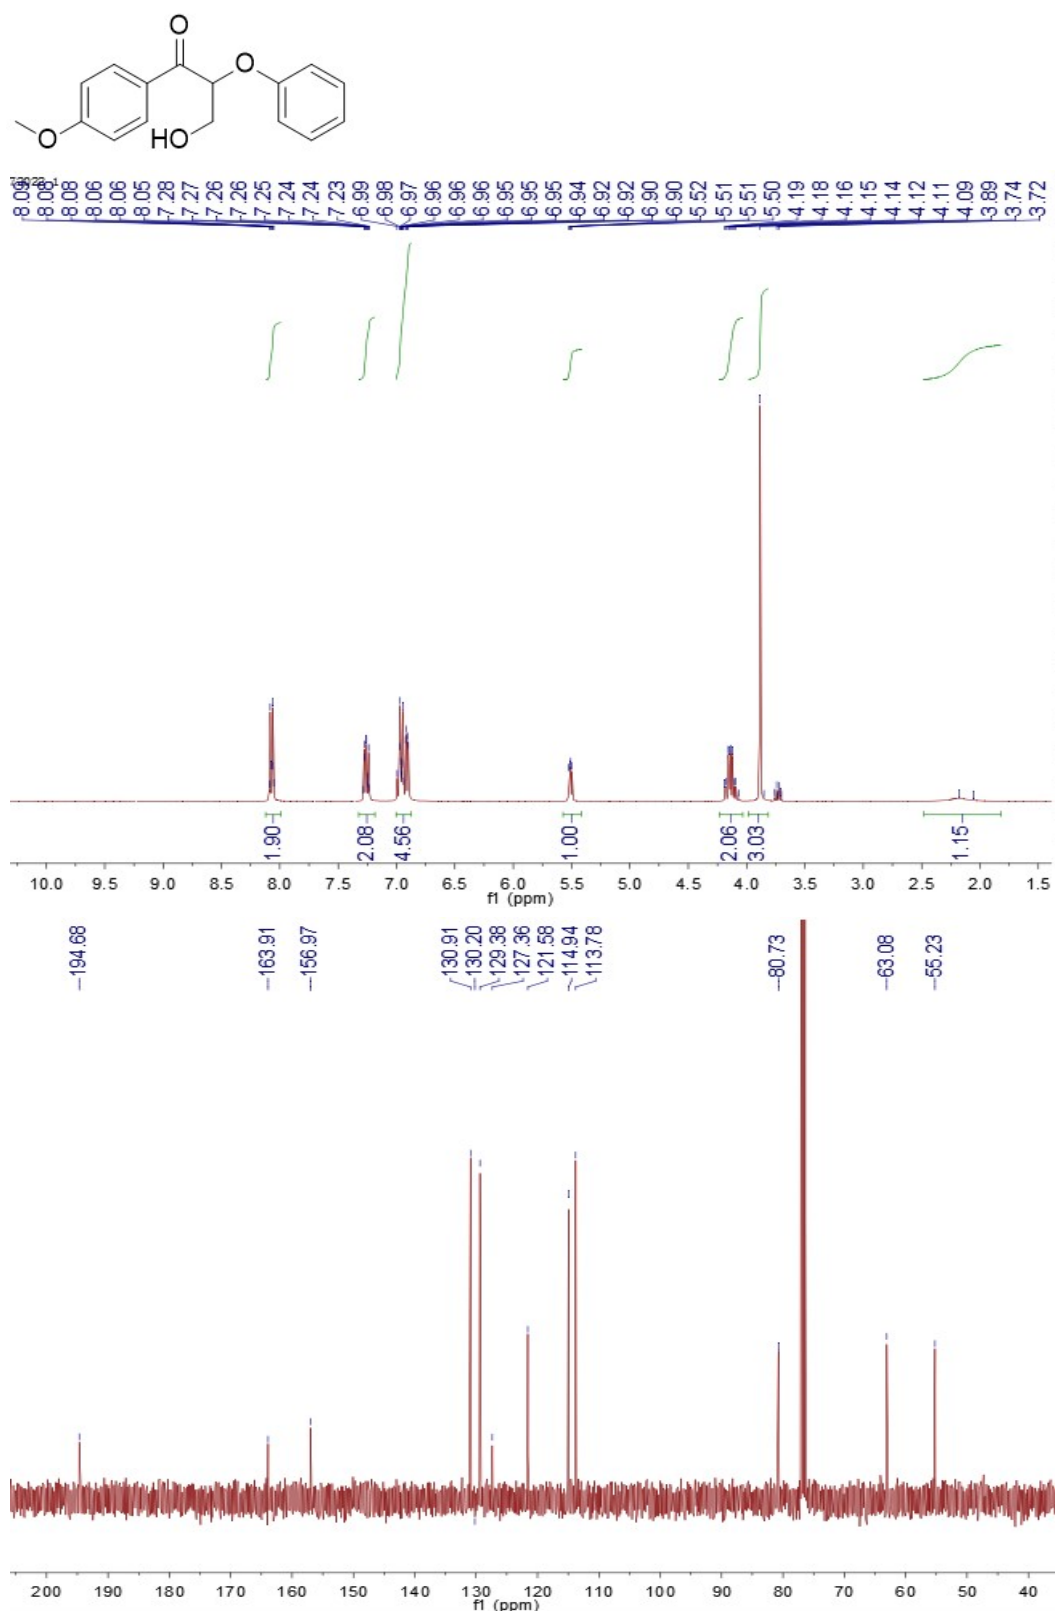

**Figure S13** <sup>1</sup>H (top) and <sup>13</sup>C (bottom) NMR spectra of 2-(cyclohexa-1,5-dien-1-yloxy)-3-hydroxy-1-(4-methoxyphenyl)propan-1-one

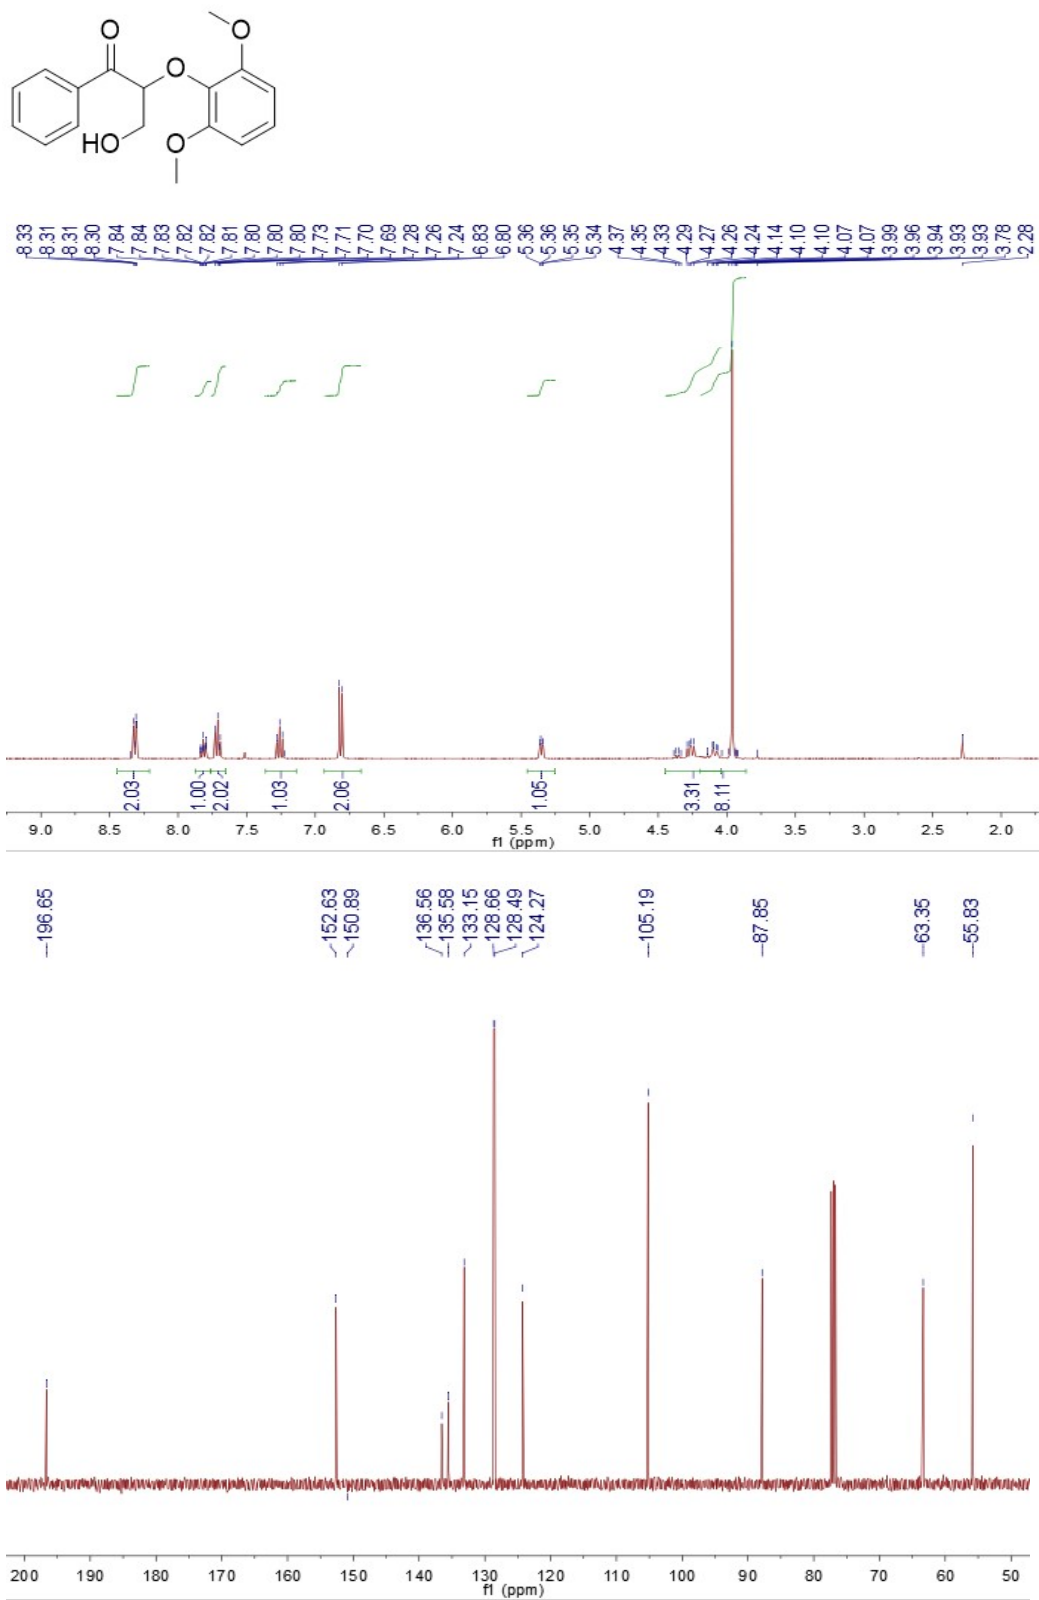

**Figure S14** <sup>1</sup>H (top) and <sup>13</sup>C (bottom) NMR spectra of 2-((2,6-dimethoxycyclohexa-1,5-dien-1-yl)oxy)-3-hydroxy-1-phenylpropan-1-one

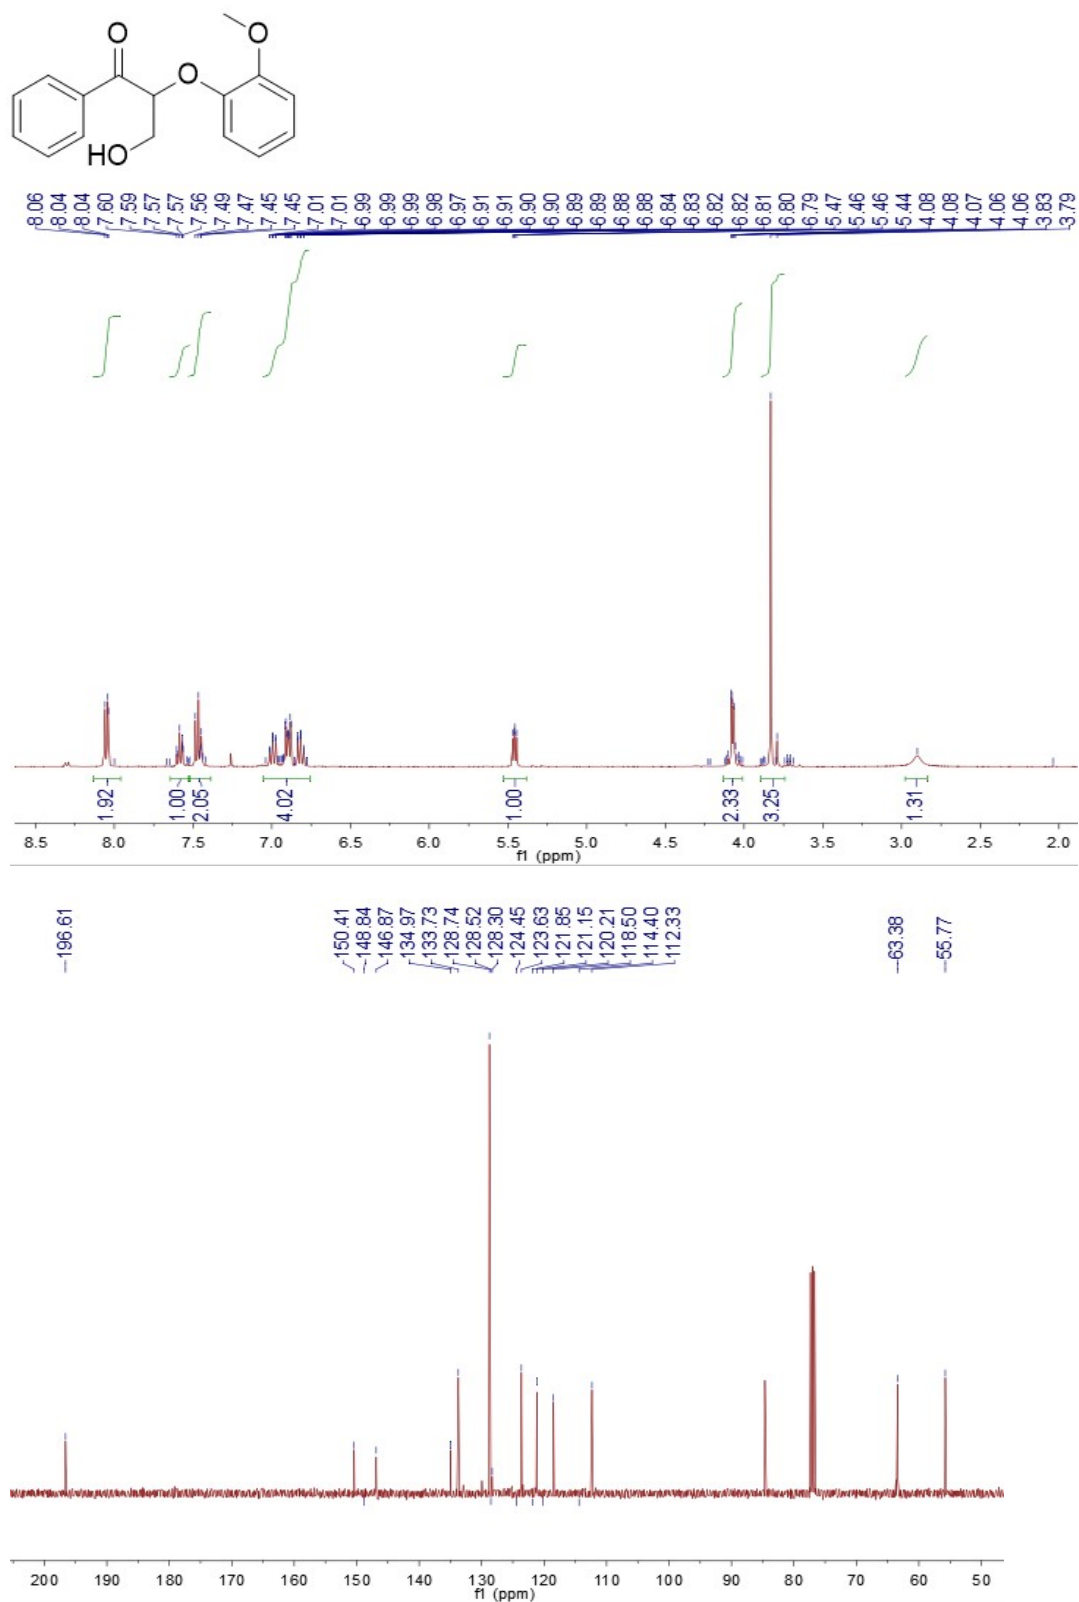

**Figure S15** <sup>1</sup>H (top) and <sup>13</sup>C (bottom) NMR spectra of 3-hydroxy-2-((6-methoxycyclohexa-1,5-dien-1-yl)oxy)-1-phenylpropan-1-one

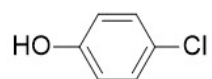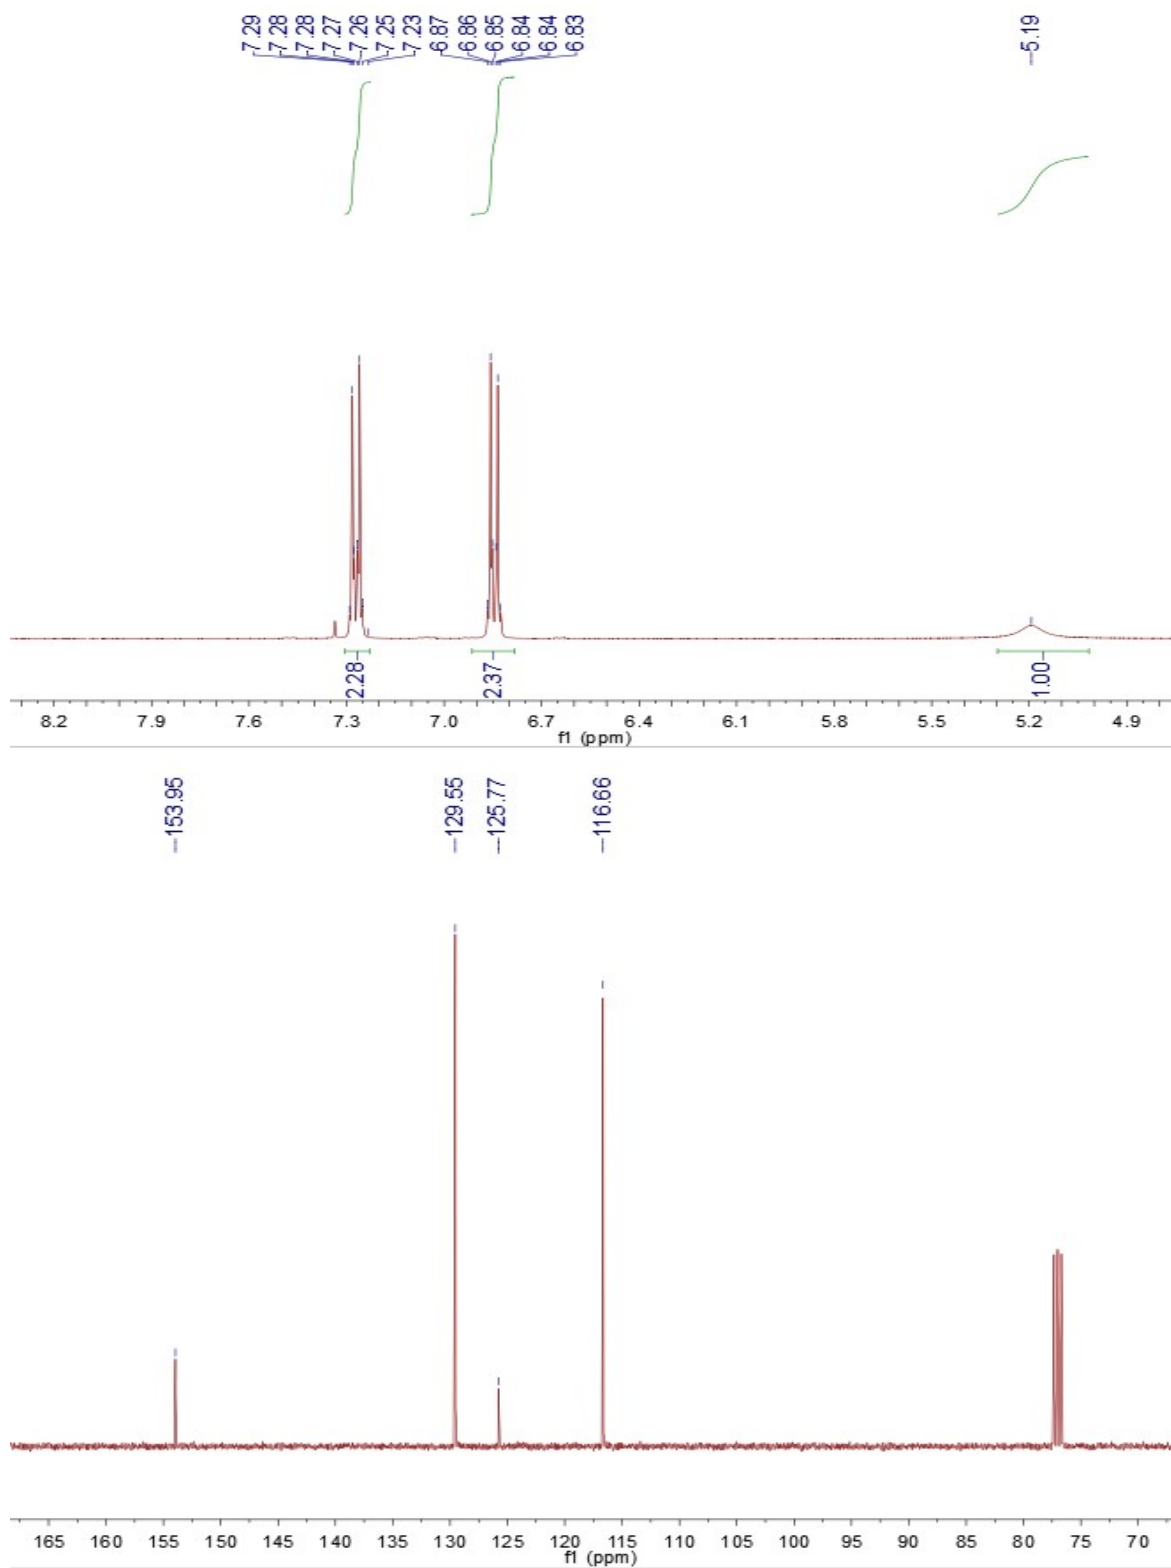

Figure S16 <sup>1</sup>H (top) and <sup>13</sup>C (bottom) NMR spectra of 4-chlorophenol

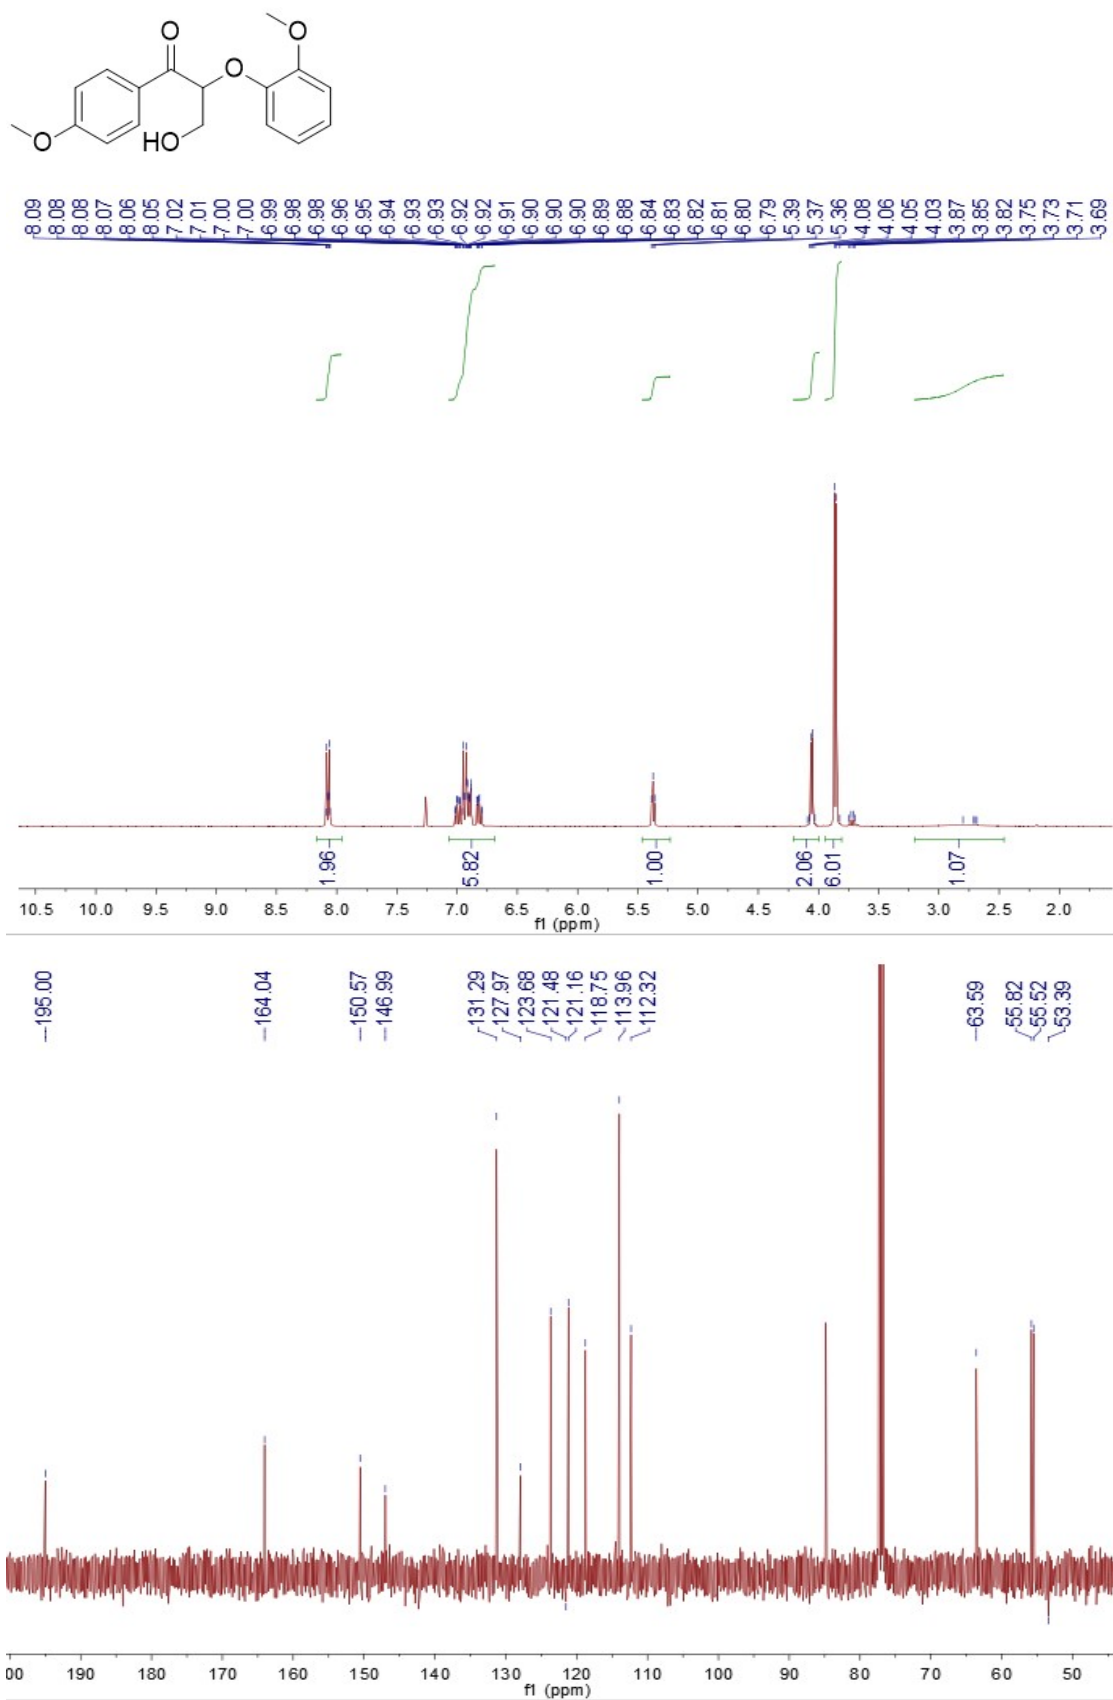

**Figure S17** <sup>1</sup>H (top) and <sup>13</sup>C (bottom) NMR spectra of 3-hydroxy-2-((6-methoxycyclohexa-1,5-dien-1-yl)oxy)-1-(4-methoxyphenyl)propan-1-one

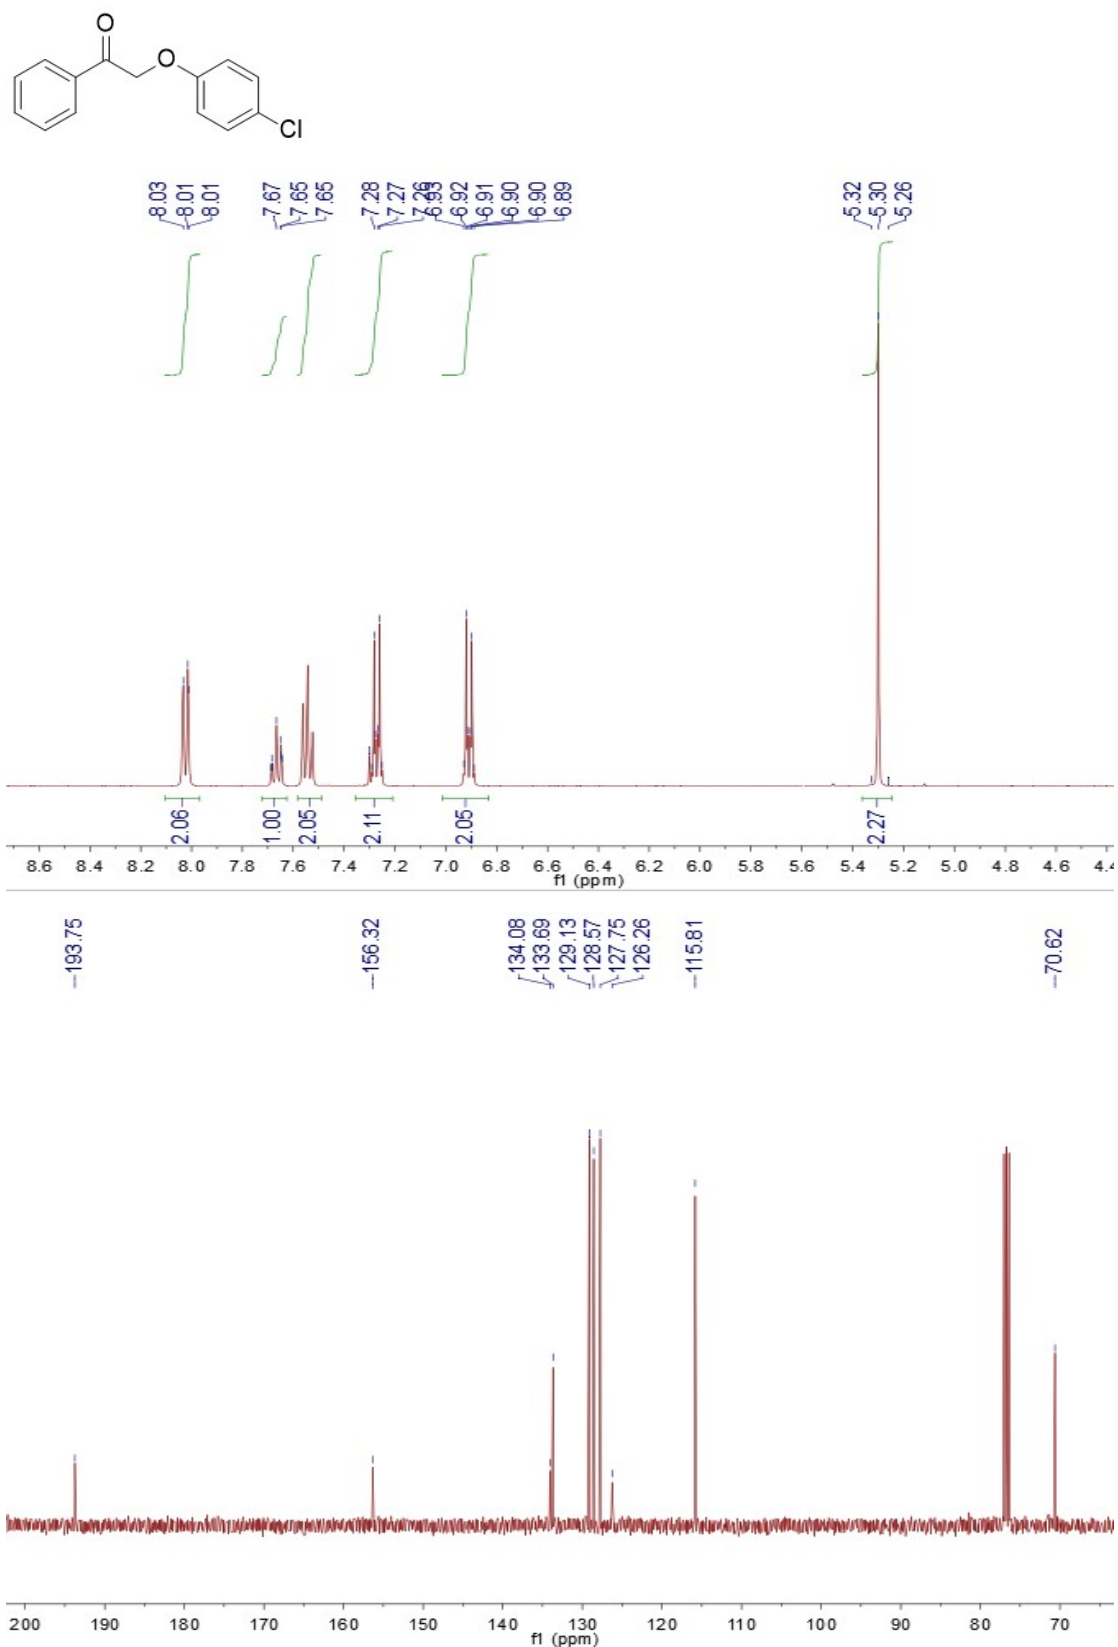

**Figure S18** <sup>1</sup>H (top) and <sup>13</sup>C (bottom) NMR spectra of 2-((4-chlorocyclohexa-1,5-dien-1-yl)oxy)-1-phenylethan-1-one



## 7. References

S1. Kim, S. A.; Kim, S. E.; Kim, Y. K.; Jang, H. Y. Copper-Catalyzed Oxidative Cleavage of the C-C Bonds of  $\beta$ -Alkoxy Alcohols and  $\beta$ -1 Compounds. *ACS Omega* 2020, **5**, 31684-31691.
